# Supplementary material for: Insights into Some Onygenalean Fungi from Freshwater Sediments in Spain and Description of Novel Taxa
Source: MDPI journal article supplement (doi:10.3390/jof9121129), 2023-11-22
Supplement: s1 [file s1]

**Table S1.** Strain information and GenBank/EMBL accession numbers of the species included in the phylogenies of this study.

| Species                               | Strain number <sup>1</sup>                                     | Substrate                           | Country             | Accession Number <sup>2</sup> |          |      |      | Reference        |
|---------------------------------------|----------------------------------------------------------------|-------------------------------------|---------------------|-------------------------------|----------|------|------|------------------|
|                                       |                                                                |                                     |                     | ITS                           | LSU      | tub2 | rpb2 |                  |
| <i>Ascosphaera apis</i>               | CBS 252.32                                                     | <i>Apis mellifera</i>               | Copenhagen, Denmark | -                             | AY004344 | -    | -    | [104]            |
|                                       | C.A.A Wynns 5004 C                                             | Pollen of <i>Megachile rotunda</i>  | USA                 | NR137060                      | NG058557 | -    | -    | [105]            |
| <i>Albidomyces albicans</i>           | CBS 151.65 <sup>T</sup> (type of <i>Arachniotus albicans</i> ) | Pasture soil                        | UK                  | MH858527                      | NG057151 | -    | -    | [106]            |
|                                       | CBS 808.71                                                     | Unknown                             | The Netherlands     | MH860366                      | -        | -    | -    | [106]            |
|                                       | FMR 17576                                                      | River sediments                     | Spain               | ON720226                      | ON720765 | -    | -    | This study       |
|                                       | FMR 18029                                                      | River sediments                     | Spain               | ON721307                      | ON720780 | -    | -    | This study       |
|                                       | FMR 18030                                                      | River sediments                     | Spain               | ON720223                      | ON720762 | -    | -    | This study       |
|                                       | FMR 18031                                                      | River sediments                     | Spain               | ON720231                      | ON720770 | -    | -    | This study       |
|                                       | FMR 18033                                                      | River sediments                     | Spain               | ON720228                      | ON720767 | -    | -    | This study       |
|                                       | FMR 18697                                                      | River sediments                     | Spain               | OP373730                      | OP373734 | -    | -    | This study       |
|                                       | FMR 18698                                                      | River sediments                     | Spain               | ON720224                      | ON720763 | -    | -    | This study       |
|                                       | FMR 18699                                                      | River sediments                     | Spain               | OP373731                      | OP373735 | -    | -    | This study       |
|                                       | FMR 19026                                                      | River sediments                     | Spain               | ON720229                      | ON720768 | -    | -    | This study       |
|                                       | FMR 19027                                                      | River sediments                     | Spain               | ON720225                      | ON720764 | -    | -    | This study       |
|                                       | FMR 19028                                                      | River sediments                     | Spain               | ON720227                      | ON720766 | -    | -    | This study       |
|                                       | FMR 19029                                                      | River sediments                     | Spain               | ON720230                      | ON720769 | -    | -    | This study       |
| <i>Amauroascopsis perforata</i>       | FMR 3882 <sup>T</sup>                                          | chicken yard soil sample            | Burundi             | AJ390377                      | -        | -    | -    | [107]            |
| <i>Amauroascus niger</i>              | CBS 114.61 <sup>T</sup>                                        | Soil                                | California, USA     | MH869547                      | AY176706 | -    | -    | [106]            |
| <i>Amauroascus purpureus</i>          | IFO 32622 <sup>T</sup>                                         | Soil                                | Japan               | AJ271564                      | AY176707 | -    | -    | [108]            |
| <i>Amauroascus volatilis-patellis</i> | CBS 249.72 <sup>T</sup>                                        | Soil                                | Utah, USA           | MH860467                      | MH872189 | -    | -    | [106]            |
| <i>Aphanoascus crassitunicatus</i>    | CBS 167.78 <sup>T</sup>                                        | Human toenail                       | France              | OW987740                      | MH872884 | -    | -    | [106]            |
|                                       | IHEM 23821                                                     | Human fingernail                    | Congo               | OW987093                      | -        | -    | -    | Only on database |
|                                       | IHEM 23817                                                     | Monoascospore isolate from RV 35694 | Belgium             | OW987091                      | -        | -    | -    | Only on database |
|                                       | FMR 18700                                                      | River sediments                     | Spain               | ON720203                      | ON720742 | -    | -    | This study       |
|                                       | FMR 18701                                                      | River sediments                     | Spain               | ON720204                      | ON720743 | -    | -    | This study       |
|                                       | FMR 18702                                                      | River sediments                     | Spain               | ON721311                      | ON720784 | -    | -    | This study       |
| <i>Aphanoascus fulvescens</i>         | CBS 115955 <sup>T</sup>                                        | Human nail of toe                   | The Netherlands     | KT155718                      | KT155038 | -    | -    | Only on database |
|                                       | CBS 743.68                                                     | Unknown                             | Switzerland         | MH859219                      | MH870944 | -    | -    | [106]            |
|                                       | NBRC 30411                                                     | Unknown                             | Japan               | JN943432                      | JN941547 | -    | -    | [109]            |
|                                       | CBS 741.68                                                     | Unknown                             | Germany             | MH859217                      | MH870942 | -    | -    | [106]            |
|                                       | FMR 18235                                                      | River sediments                     | Spain               | ON720208                      | ON720747 | -    | -    | This study       |

|                                          |                                                                              |                                      |                        |          |          |   |   |                  |
|------------------------------------------|------------------------------------------------------------------------------|--------------------------------------|------------------------|----------|----------|---|---|------------------|
|                                          | FMR 18236                                                                    | River sediments                      | Spain                  | ON720210 | ON720749 | - | - | This study       |
|                                          | FMR 18241                                                                    | River sediments                      | Spain                  | ON721308 | ON720781 | - | - | This study       |
|                                          | FMR 18242                                                                    | River sediments                      | Spain                  | ON720211 | ON720750 | - | - | This study       |
|                                          | FMR 18243                                                                    | River sediments                      | Spain                  | ON942224 | ON942226 | - | - | This study       |
|                                          | FMR 18704                                                                    | River sediments                      | Spain                  | ON720207 | ON720746 | - | - | This study       |
|                                          | FMR 19018                                                                    | River sediments                      | Spain                  | ON720212 | ON720751 | - | - | This study       |
|                                          | FMR 19019                                                                    | River sediments                      | Spain                  | ON720209 | ON720748 | - | - | This study       |
|                                          | FMR 19020                                                                    | River sediments                      | Spain                  | ON721312 | ON720785 | - | - | This study       |
|                                          | FMR 19021                                                                    | River sediments                      | Spain                  | ON720205 | ON720744 | - | - | This study       |
|                                          | FMR 19022                                                                    | River sediments                      | Spain                  | ON720206 | ON720745 | - | - | This study       |
| <i>Aphanoascus mephitalis</i>            | ATCC 22144                                                                   | Wolf dung                            | Ontario, Canada        | MH859941 | AY176725 | - | - | [106]            |
| <b><i>Aphanoascus reticulisporus</i></b> | CBS 392.67 <sup>T</sup>                                                      | Unknown                              | New Zealand            | MH859002 | MH870704 | - | - | [106]            |
|                                          | ChryCu                                                                       | Human invasive pulmonary infection   | Unknown                | KJ808704 | -        | - | - | [110]            |
|                                          | NBRC 32372                                                                   | Unknown                              | New Zealand            | JN943434 | JN941549 | - | - | [109]            |
|                                          | UAMH 4320                                                                    | Wool of <i>Sicistae betulinae</i>    | USSR                   | AJ007841 | -        | - | - | [36]             |
|                                          | FMR 18004                                                                    | River sediments                      | Spain                  | ON720200 | ON720739 | - | - | This study       |
|                                          | FMR 19012                                                                    | River sediments                      | Spain                  | ON720201 | ON720740 | - | - | This study       |
|                                          | FMR 19013                                                                    | River sediments                      | Spain                  | ON720202 | ON720741 | - | - | This study       |
|                                          | FMR 19033                                                                    | River sediments                      | Spain                  | OP373732 | OP373736 | - | - | This study       |
| <i>Aphanoascus verrucosus</i>            | CBS 171.72; MUCL 10068 <sup>T</sup> (type of <i>Chrysosporium tropicum</i> ) | Woollen overcoat                     | Solomon Islands        | MH858134 | AY176731 | - | - | [106]            |
| <i>Apinisia graminicola</i>              | CBS 721.68 <sup>T</sup>                                                      | On rooting <i>Poaceae</i>            | UK                     | -        | NG056945 | - | - | [111]            |
| <i>Apinisia racovitzae</i>               | CBS 156.77 <sup>T</sup>                                                      | Skin lesion                          | USA                    | MZ435253 | AB040696 | - | - | [8]              |
| <i>Arachniotus verruculosus</i>          | CBS 655.71                                                                   | Soil                                 | Utah, USA              | NR145221 | AB040684 | - | - | Only on database |
| <i>Arachnomyces bostrychodes</i>         | CBS 146926                                                                   | Human scalp                          | Texas, USA             | LR701765 | LR701766 | - | - | [51]             |
| <i>Arachnomyces pilosus</i>              | CBS 250.93 <sup>T</sup>                                                      | River sediments                      | Catalonia, Spain       | MF572320 | MF572325 | - | - | [46]             |
| <i>Arachnotheca glomerata</i>            | CBS 348.71 <sup>IT</sup>                                                     | Soil                                 | Central Africa         | -        | NG056931 | - | - | [106]            |
|                                          | CBS 349.71                                                                   | Soil                                 | Central Africa         | MH860158 | MH871926 | - | - | [106]            |
| <i>Ascosphaera subglobosa</i>            | C.A.A. Wynns 5004 C                                                          | Pollen of <i>Megachile rotundata</i> | Utah, USA              | NR137060 | HQ540517 | - | - | [105]            |
| <b><i>Arthroderma curreyi</i></b>        | CBS 353.66 <sup>T</sup>                                                      | Unknown                              | UK                     | MH858822 | MH870459 | - | - | [106]            |
|                                          | FMR 19038                                                                    | River sediments                      | Spain                  | ON720238 | ON720777 | - | - | This study       |
| <i>Arthroderma onychocola</i>            | CBS 132920 <sup>T</sup>                                                      | Human nail                           | Prague, Czech Republic | KT155794 | KT155124 | - | - | Only on database |
| <i>Auxarthronopsis bandhavgarhensis</i>  | NFCCI 2185 <sup>T</sup>                                                      | Soil                                 | Bandhavgarh, India     | HQ164436 | NG057012 | - | - | [15]             |

|                                           |                            |                                 |                    |          |          |   |   |                       |
|-------------------------------------------|----------------------------|---------------------------------|--------------------|----------|----------|---|---|-----------------------|
| <i>Auxarthronopsis guizhouensis</i>       | CGMCC 3.17910 <sup>T</sup> | Air                             | Guizhou, China     | KU746668 | KU746714 | - | - | [112]                 |
| <i>Blastomyces percursus</i>              | CBS 139878 <sup>T</sup>    | From human                      | South Africa       | NR153647 | KY195971 | - | - | [114]                 |
| <i>Blastomyces dermatitidis</i>           | CBS 674.68 <sup>T</sup>    | Unknown                         | USA                | MH859201 | MH870922 | - | - | [106]                 |
| <i>Canomyces reticulatus</i>              | MCC 1486 <sup>T</sup>      | Soil                            | Maharashtra, India | MK340501 | MK340502 | - | - | [15]                  |
| <i>Chrysosporium carmichaelii</i>         | CBS 643.79 <sup>T</sup>    | Unknown                         | Michigan, USA      | NR077133 | NG058857 | - | - | [113]                 |
| <i>Chrysosporium chiropterorum</i>        | MUCL 45495 <sup>T</sup>    | Fur of bat                      | France             | AM949570 | AM949570 | - | - | [114]                 |
| <i>Chrysosporium lobatum</i>              | CBS 275.77                 | On hair of <i>Mus musculus</i>  | Russia             | -        | KT155192 | - | - | Only on database      |
| <i>Chrysosporium pallidum</i>             | CGMCC 3.19575 <sup>T</sup> | Dung                            | Guangxi, China     | NR172829 | NG075267 | - | - | [83]                  |
| <i>Chrysosporium sulfureum</i>            | CBS 634.79                 | Cheese rind                     | Switzerland        | KT155953 | KT155298 | - | - | Only on database      |
| <i>Chrysosporium undulatum</i>            | CBS 964.97 <sup>T</sup>    | River sediments                 | Spain              | NR157455 | NG063939 | - | - | [36], and on database |
| <i>Chrysosporium vallenarense</i>         | CBS 627.83 <sup>T</sup>    | Semi-desert                     | Chile              | MH861669 | NG063937 | - | - | [106]                 |
| <i>Ctenomyces serratus</i>                | CBS 187.61 <sup>T</sup>    | On rotting feathers of Aves     | Germany            | MH858017 | MH869579 | - | - | [106]                 |
| <i>Currahmyces indicus</i>                | MCC 1548 <sup>T</sup>      | Hen resting area                | Maharashtra, India | MK340498 | MK340499 | - | - | [15]                  |
| <i>Currahmyces sparsispora</i>            | CBS 146929 <sup>T</sup>    | Human sputum                    | Florida, USA       | LR723272 | LR723273 | - | - | [51]                  |
| <i>Emergomyces crescens</i>               | CBS 177.60 <sup>T</sup>    | Unknown                         | Norway             | MH857947 | MH869492 | - | - | [106]                 |
| <i>Emergomyces pasteurianus</i>           | CBS 101236 <sup>T</sup>    | Human cutaneous lesion          | Italy              | -        | NG070831 | - | - | [14]                  |
| <i>Emmonsiiopsis coralliformis</i>        | FMR 4024 <sup>T</sup>      | River sediments                 | Spain              | NR153996 | NG059238 | - | - | [37]                  |
| <i>Emmonsiiopsis terrestris</i>           | UAMH 2304 <sup>T</sup>     | Soil                            | USA                | AF038320 | AF038320 | - | - | [48]                  |
| <b><i>Emmonsiiopsis tuberculata</i></b>   | FMR 17582 <sup>T</sup>     | River sediments                 | Spain              | LR598892 | LR598891 | - | - | [38]                  |
| <i>Emydomyces testavorans</i>             | ATCC TSD-145 <sup>T</sup>  | Shell lesions of a turtle       | USA                | NR160604 | NG066406 | - | - | [95]                  |
| <i>Epidermophyton floccosum</i>           | CBS 230.76 <sup>T</sup>    | Human                           | Unknown            | KT155837 | KT155176 | - | - | [115]                 |
| <i>Guaromyces ceretanicus</i>             | CBS 269.89 <sup>T</sup>    | Unknown                         | Unknown            | NR154051 | NG058484 | - | - | [116]                 |
| <b><i>Gymnoascoideus petalosporus</i></b> | CBS 252.72                 | Unknown                         | Unknown            | -        | AB040685 | - | - | [117]                 |
|                                           | FMR 19036                  | River sediments                 | Spain              | ON720236 | ON720775 | - | - | This study            |
| <i>Gymnoascus reesii</i>                  | CBS 410.72                 | Soil                            | California, USA    | MH860507 | MH872224 | - | - | [106]                 |
| <i>Helicoarthrosporum mellicola</i>       | CBS 143838 <sup>T</sup>    | Honey                           | Granada, Spain     | LR761645 | LT906535 | - | - | [51]                  |
|                                           | FMR 15673                  | Honey                           | Valencia, Spain    | LR761646 | LT978462 | - | - | [51]                  |
| <i>Helicocarpus griseus</i>               | CBS 128.88 <sup>T</sup>    | Unknown                         | Algeria            | MH862124 | MH873814 | - | - | [106]                 |
| <i>Histoplasma capsulatum</i>             | UAMH 3536 <sup>T</sup>     | Woman biopsy of right lung      | Alberta, Canada    | AF038354 | AF038354 | - | - | [48]                  |
| <b><i>Leucothecium emdenii</i></b>        | CBS 576.73 <sup>T</sup>    | Soil                            | The Netherlands    | -        | NG057812 | - | - | [118]                 |
|                                           | CBS 370.92                 | Marine sediments                | Spain              | AB213434 | HG004546 | - | - | [87]                  |
|                                           | FMR 18703                  | River sediments                 | Spain              | ON720239 | ON720778 | - | - | This study            |
| <i>Lophophyton gallinae</i>               | CBS 243.66                 | Infection in <i>Canis lupus</i> | Montana, USA       | KT155842 | KT155181 |   |   | [115]                 |
| <i>Malbranchea albolutea</i>              | CBS 125.77 <sup>T</sup>    | Soil                            | Utah, USA          | MH861039 | MH872808 | - | - | [106]                 |

|                                       |                            |                           |                 |          |          |          |          |                  |
|---------------------------------------|----------------------------|---------------------------|-----------------|----------|----------|----------|----------|------------------|
|                                       | FMR 17679                  | Human BAL                 | Texas, USA      | LR701834 | LR701835 | -        | -        | [51]             |
| <i>Malbranchea aurantiaca</i>         | CBS 127.77 <sup>T</sup>    | Culture contaminant       | Utah, USA       | NR157447 | AB040704 | -        | -        | [117]            |
|                                       | FMR 17682                  | Animal skin lesion        | Texas, USA      | LR701826 | LR701827 | -        | -        | [51]             |
|                                       | FMR 17688                  | Animal                    | California, USA | LR701824 | LR701825 | -        | -        | [51]             |
| <i>Malbranchea californiensis</i>     | ATCC 15600 <sup>T</sup>    | Dung of pack rat          | California, USA | MH858121 | MH858121 | -        | -        | [106]            |
| <b><i>Malbranchea chinensis</i></b>   | CGMCC 3.19572 <sup>T</sup> | Soil of karst cave        | Guanxi, China   | NR172823 | MK328981 | MK336102 | -        | [83]             |
|                                       | FMR 18267                  | River sediments           | Spain           | ON720190 | ON720729 | OP425706 | OP425715 | This study       |
| <i>Malbranchea chlamydospora</i>      | RV 24809 <sup>T</sup>      | Unknown                   | Unknown         | AJ271425 | -        | -        | -        | [108]            |
| <i>Malbranchea chrysosporoidea</i>    | CBS 128.77 <sup>T</sup>    | Soil                      | Arizona, USA    | AB361632 | AB359413 | -        | -        | Only on database |
| <i>Malbranchea cinnamomea</i>         | CBS 343.55                 | Old straw in poultry farm | The Netherlands | MH857506 | KT155221 | -        | -        | [106]            |
| <i>Malbranchea circinata</i>          | CBS 129.77 <sup>T</sup>    | Soil                      | Utah, USA       | MN627784 | MN627782 | -        | -        | [119]            |
| <i>Malbranchea compacta</i>           | CBS 200.64 <sup>T</sup>    | Unknown                   | California, USA | MH858415 | MH870043 | -        | -        | [106]            |
| <i>Malbranchea concentrica</i>        | CBS 112861 <sup>T</sup>    | Unknown                   | Unknown         | NR111089 | -        | -        | -        | [108]            |
| <i>Malbranchea conjugata</i>          | CBS 247.58                 | Soil                      | Arizona, USA    | NR121475 | HF545313 | HE974414 | HE974413 | [113]            |
|                                       | FMR 17697                  | Human BAL                 | Texas, USA      | LR701830 | LR701831 | -        | -        | [51]             |
|                                       | FMR 17699                  | Human lung tissue         | Florida, USA    | LR701828 | LR701829 | -        | -        | [51]             |
| <i>Malbranchea dendritica</i>         | CBS 131.77 <sup>T</sup>    | Soil                      | Utah, USA       | AY177310 | AB359416 | -        | -        | [120]            |
| <b><i>Malbranchea echinulata</i></b>  | FMR 17906 <sup>T</sup>     | River sediments           | Spain           | ON720198 | ON720737 | OP425705 | -        | This study       |
| <i>Malbranchea filamentosa</i>        | CBS 581.82 <sup>T</sup>    | Soil                      | Argentina       | NR111136 | AB359417 | -        | -        | [113]            |
| <i>Malbranchea flava</i>              | CBS 132.77 <sup>T</sup>    | Soil                      | California, USA | AB361633 | AB359418 | -        | -        | Only on database |
| <i>Malbranchea flocciformis</i>       | CBS 133.77 <sup>T</sup>    | Saline soil               | France          | AB361634 | AB359420 | -        | -        | Only on database |
|                                       | FMR 17698                  | Human skin                | Texas, USA      | LR701822 | LR701823 | -        | -        | [51]             |
| <i>Malbranchea fulva</i>              | CBS 135.77 <sup>T</sup>    | Air                       | Utah, USA       | NR157444 | AB359422 | -        | -        | Only on database |
| <i>Malbranchea guanxiense</i>         | CGMCC 3.19634 <sup>T</sup> | Soil of karst cave        | Guanxi, China   | MK329080 | MK328985 | MK336106 | -        | [85]             |
| <i>Malbranchea gymnoascoides</i>      | CBS 146930 <sup>T</sup>    | Human BAL                 | Texas, USA      | LR701757 | LR701758 | -        | -        | [51]             |
| <b><i>Malbranchea irregularis</i></b> | FMR 19016 <sup>T</sup>     | River sediments           | Spain           | ON720191 | ON720730 | OP425710 | OP425719 | This study       |
|                                       | FMR 19017                  | River sediments           | Spain           | ON720192 | ON720731 | OP425713 | OP425722 | This study       |
|                                       | FMR 19030                  | River sediments           | Spain           | ON720193 | ON720732 | OP425712 | OP425721 | This study       |
|                                       | FMR 19015                  | River sediments           | Spain           | ON720194 | ON720733 | OP425711 | OP425720 | This study       |
| <i>Malbranchea kuehnii</i>            | CBS 539.72 <sup>T</sup>    | Dung                      | Unknown         | NR103573 | NG056928 | -        | -        | [113]            |
| <b><i>Malbranchea sinuata</i></b>     | FMR 18266 <sup>T</sup>     | River sediments           | Spain           | ON720195 | ON720734 | OP425704 | OP425714 | This study       |
| <i>Malbranchea longispora</i>         | FMR 12768 <sup>T</sup>     | Soil                      | Beija, Portugal | HG326873 | HG326874 | -        | -        | [121]            |
| <i>Malbranchea multiseptata</i>       | CBS 146931 <sup>T</sup>    | Human BAL                 | Texas, USA      | LR701759 | LR701760 | -        | -        | [51]             |

|                                           |                         |                           |                    |          |          |          |          |                   |
|-------------------------------------------|-------------------------|---------------------------|--------------------|----------|----------|----------|----------|-------------------|
| <b><i>Malbranchea ostraviensis</i></b>    | CCF 4241 <sup>T</sup>   | Human Fingernails         | Czech Republic     | NR121474 | -        | HE974417 | HE974411 | [113]             |
|                                           | FMR 18693               | River sediments           | Spain              | ON720199 | ON720738 | OP425707 | OP425716 | This study        |
| <i>Malbranchea pseudoauxarthron</i>       | CBS 657.71 <sup>T</sup> | Unknown                   | Unknown            | MH860293 | -        | -        | -        | [106]             |
| <i>Malbranchea pseudoreticulata</i>       | UAMH 3117 <sup>T</sup>  | Lizard dung               | Mexico             | NR111111 | -        | -        | -        | [108]             |
| <i>Malbranchea pulchella</i>              | CBS 202.38              | Unknown                   | Italy              | AB361638 | AB359426 | -        | -        | Only on database  |
| <b><i>Malbranchea reticulata</i></b>      | CBS 201.64 <sup>T</sup> | Wood from greenhouse flat | California, USA    | OW986827 | OW986827 | -        | -        | Only on data base |
|                                           | FMR 18696               | River sediments           | Spain              | ON721310 | ON720783 | -        | -        | This study        |
| <i>Malbranchea setosa</i>                 | CBS 198.92 <sup>T</sup> | Soil                      | Congo              | KT155638 | -        | -        | -        | Only on database  |
| <i>Malbranchea stricta</i>                | CBS 146932 <sup>T</sup> | Human nail                | Florida, USA       | LR701638 | LR701639 | -        | -        | [51]              |
| <i>Malbranchea thaxteri</i>               | CBS 248.58 <sup>T</sup> | Opossum dung              | Haiti              | NR111138 | -        | HE974416 | HE974412 | [113]             |
| <b><i>Malbranchea umbrina</i></b>         | CBS 105.09 <sup>T</sup> | Soil                      | UK                 | MH854591 | MH866116 | HE974415 | HE974407 | [106]             |
|                                           | CBS 226.58              | Unknown                   | Unknown            | MH857765 | MH869296 | -        | -        | [106]             |
|                                           | FMR 17693               | Human nail                | Washington DC, USA | LR701820 | LR701821 | -        | -        | [51]              |
|                                           | FMR 17899               | River sediments           | Spain              | ON721306 | ON720779 | -        | -        | This study        |
|                                           | FMR 18695               | River sediments           | Spain              | ON720196 | ON720735 | OP425709 | OP425718 | This study        |
|                                           | FMR 18766               | River sediments           | Spain              | ON720197 | ON720736 | OP425708 | OP425717 | This study        |
| <i>Malbranchea zuffiana</i>               | CBS 219.58 <sup>T</sup> | Prairie dog lung          | Texas, USA         | MH869293 | AY176712 | -        | -        | [106]             |
| <i>Mallochia reticulata</i>               | CBS 392.61 <sup>T</sup> | Unknown                   | Honduras           | MH858097 | MH869667 | -        | -        | [108]             |
| <i>Microsporum audouinii</i>              | CBS 545.93 <sup>T</sup> | Human                     | France             | NR144883 | NG069298 | -        | -        | [122]             |
| <i>Myotsia cremea</i>                     | CBS 141864 <sup>T</sup> | Bat droppings             | Czech Republic     | NG088058 | NG088058 | -        | -        | [123]             |
| <b><i>Myriodontium keratinophilum</i></b> | CBS 947.73 <sup>T</sup> | Soil                      | Italy              | NR157454 | NG063938 | -        | -        | Only on database  |
|                                           | CBS 256.81              | Unknown                   | The Netherlands    | MH861337 | MH873097 | -        | -        | [106]             |
|                                           | IHEM 19171              | Persian cat               | Belgium            | OW985860 | -        | -        | -        | Only on database  |
|                                           | FMR 17624               | River sediments           | Spain              | ON720220 | ON720759 | -        | -        | This study        |
|                                           | FMR 18244               | River sediments           | Spain              | ON720222 | ON720761 | -        | -        | This study        |
|                                           | FMR 18245               | River sediments           | Spain              | ON720213 | ON720752 | -        | -        | This study        |
|                                           | FMR 18246               | River sediments           | Spain              | ON720221 | ON720760 | -        | -        | This study        |
|                                           | FMR 18247               | River sediments           | Spain              | ON721309 | ON720782 | -        | -        | This study        |
|                                           | FMR 18248               | River sediments           | Spain              | ON720215 | ON720754 | -        | -        | This study        |
|                                           | FMR 18249               | River sediments           | Spain              | ON720216 | ON720755 | -        | -        | This study        |
|                                           | FMR 18250               | River sediments           | Spain              | ON720218 | ON720757 | -        | -        | This study        |
|                                           | FMR 18251               | River sediments           | Spain              | ON720217 | ON720756 | -        | -        | This study        |
|                                           | FMR 18257               | River sediments           | Spain              | ON720214 | ON720753 | -        | -        | This study        |

|                                            |                                                                 |                                              |                 |          |          |   |   |                  |
|--------------------------------------------|-----------------------------------------------------------------|----------------------------------------------|-----------------|----------|----------|---|---|------------------|
|                                            | FMR 18258                                                       | River sediments                              | Spain           | ON720219 | ON720758 | - | - | This study       |
|                                            | FMR 19031                                                       | River sediments                              | Spain           | OP070725 | OP077087 | - | - | This study       |
| <i>Nannizzia incurvata</i>                 | CBS 174.64 <sup>T</sup>                                         | Human                                        | UK              | MH858406 | MH870033 | - | - | [106]            |
| <i>Nannizziopsis guarroi</i>               | CBS 124553 <sup>T</sup>                                         | Iguana skin                                  | Spain           | MH863384 | MH874904 | - | - | [106]            |
| <i>Nannizziopsis vriesii</i>               | CBS 407.71 <sup>T</sup>                                         | Ameiva (lizard) skin and lung                | The Netherlands | AJ131687 | AY176715 | - | - | [111]            |
| <b><i>Neorhizoglyphus hispanica</i></b>    | CBS 351.92 <sup>T</sup> (type of <i>Arthrospira hispanica</i> ) | Marine sediments                             | Spain           | HE965758 | HE965759 | - | - | [81]             |
|                                            | UTHSC 09-3174                                                   | Bronchial wash                               | USA             | HE965756 | HE965757 | - | - | [81]             |
|                                            | FMR 12113                                                       | Nails                                        | USA             | KP131547 | -        | - | - | [124]            |
|                                            | FMR 18694                                                       | River sediments                              | Spain           | ON720234 | ON720773 | - | - | This study       |
|                                            | FMR 19034                                                       | River sediments                              | Spain           | ON720232 | ON720771 | - | - | This study       |
|                                            | FMR 19035                                                       | River sediments                              | Spain           | ON720233 | ON720772 | - | - | This study       |
| <b><i>Neorhizoglyphus sexualis</i></b>     | FMR 19025 <sup>T</sup>                                          | River sediments                              | Spain           | ON720235 | ON720774 | - | - | This study       |
| <i>Neogymnomycetes demonbreunii</i>        | ATCC 18394                                                      | Unknown                                      | Missouri, USA   | AJ315842 | AY176716 | - | - | [106]            |
| <i>Onygena corvina</i>                     | CBS 152.73 <sup>NT</sup>                                        | Unknown                                      | The Netherlands | OR167982 | MH878305 | - | - | [106]            |
| <i>Onygena equina</i>                      | CBS 947.70 <sup>NT</sup>                                        | Unknown                                      | Unknown         | MZ159461 | AB075356 | - | - | [49]             |
| <i>Paracoccidioides brasiliensis</i>       | UAMH 8037 <sup>T</sup>                                          | Human lung biopsy                            | Alberta, Canada | AF038360 | AF038360 | - | - | [48]             |
| <i>Paraphyton cookei</i>                   | CBS 228.58 <sup>T</sup>                                         | Unknown                                      | Unknown         | NR155665 | NG058188 | - | - | Only on database |
| <i>Polytolypa hystricis</i>                | UAMH 7299 <sup>T</sup>                                          | From dung                                    | Canada          | NR111161 | NG042396 | - | - | [113]            |
| <b><i>Pseudoamaurascopsis spiralis</i></b> | FMR 19014 <sup>T</sup>                                          | River sediments                              | Spain           | ON720237 | ON720776 | - | - | This study       |
| <i>Pseudoarthropsis cirrhata</i>           | CBS 628.83 <sup>T</sup>                                         | Wall sample                                  | The Netherlands | -        | NG060792 | - | - | [87]             |
| <i>Pseudoarthropsis crassisporea</i>       | CBS 146928                                                      | Human BAL                                    | Minnesota, USA  | LR701763 | LR701764 | - | - | [51]             |
| <i>Pseudomalbranchea gemmata</i>           | CBS 146933 <sup>T</sup>                                         | Human BAL                                    | Florida, USA    | LR701761 | LR701762 | - | - | [51]             |
| <i>Pseudospiromastix tentaculata</i>       | CBS 184.92 <sup>T</sup>                                         | Soil                                         | Hiram, Somalia  | AY527406 | LN867603 | - | - | [50]             |
| <i>Renispora flavissima</i>                | ATCC 38503 <sup>T</sup>                                         | Soil                                         | Kansa, USA      | AJ390392 | NG059414 | - | - | [111]            |
| <i>Shanorella spirotricha</i>              | CBS 304.56 <sup>T</sup>                                         | On feathers of dead Aves                     | California, USA | MH857651 | MH869194 | - | - | [106]            |
| <i>Sigleria amenda</i>                     | CBS 138257 <sup>T</sup>                                         | House dust                                   | Mexico          | KP119656 | KP119643 | - | - | [125]            |
| <i>Sigleria carmichaelii</i>               | CBS 138264 <sup>T</sup>                                         | House dust                                   | Micronesia      | KP119626 | KP119638 | - | - | [125]            |
| <i>Spiromastigoides alatospora</i>         | CBS 457.73 <sup>T</sup>                                         | Unknown                                      | India           | MH860740 | MH872453 | - | - | [106]            |
| <i>Spiromastigoides albida</i>             | CBS 139510 <sup>T</sup>                                         | Human lung biopsy                            | Texas, USA      | LN867606 | LN867602 | - | - | [126]            |
| <i>Spiromastigoides asexualis</i>          | CBS 136728 <sup>T</sup>                                         | From shepherd dog                            | USA             | KJ880032 | LN867603 | - | - | [127]            |
| <i>Spiromastigoides curvata</i>            | JCM 11275 <sup>T</sup>                                          | Contaminant of a <i>H. capsulatum</i> strain | Mexico          | KP119631 | KP119644 | - | - | [125]            |
| <i>Spiromastigoides frutex</i>             | CBS 138266 <sup>T</sup>                                         | House dust, rental studio                    | Nayarit, Mexico | KP119632 | KP119645 | - | - | [125]            |
| <i>Spiromastigoides geomyces</i>           | CBS 146934                                                      | Human skin foot                              | Illinois, USA   | LR701767 | LR701768 | - | - | [51]             |
| <i>Spiromastigoides gypsea</i>             | CBS 134.77 <sup>T</sup>                                         | Soil                                         | California, USA | KT155798 | NG063935 | - | - | [51]             |

|                                          |                         |            |                    |          |          |   |   |       |
|------------------------------------------|-------------------------|------------|--------------------|----------|----------|---|---|-------|
| <i>Spiromastigoides kosraensis</i>       | CBS 138267 <sup>T</sup> | House dust | Kosrae, Micronesia | KP119633 | KP119646 | - | - | [125] |
| <i>Spiromastigoides pyramidalis</i>      | CBS 138269 <sup>T</sup> | House dust | Australia          | KP119636 | KP119649 | - | - | [125] |
| <i>Spiromastigoides sugiyamae</i>        | JCM 11276 <sup>T</sup>  | Soil       | Japan              | LN867608 | AB040680 | - | - | [126] |
| <i>Spiromastigoides warcupii</i>         | CBS 576.63 <sup>T</sup> | Soil       | Australia          | LN867609 | AB040679 | - | - | [117] |
| <i>Strongyloarthrosporum catenulatum</i> | CBS 143841 <sup>T</sup> | Honey      | Toledo             | LR760230 | LT906534 | - | - | [51]  |
| <i>Trichophyton bulbosum</i>             | CBS 363.35 <sup>T</sup> | Unknown    | Unknown            | NR144895 | NG058191 | - | - | [129] |
| <i>Trichophyton tonsurans</i>            | CBS 496.48 <sup>T</sup> | Unknown    | France             | MH856446 | MH867992 | - | - | [106] |
| <i>Uncinocarpus reesii</i>               | ATCC 34533              | Feather    | Australia          | MH861035 | AY176724 | - | - | [106] |

<sup>1</sup>ATCC: American Type Culture Collection, USA; CBS: Culture collection of the Westerdijk Fungal Biodiversity Institute, Utrecht, the Netherlands; CCF: Culture Collection of Fungi, Faculty of Science, Charles University, Benátská, Czech Republic. CGMCC: China General Microbiological Culture Collection Centre, Institute of Microbiology, Chinese Academy of Sciences, Beijing, China; ChryCU: C.A.A. Wynns; FMR: Facultat de Medicina i Ciències de la Salut, Reus, Spain; IFO: Institute for Fermentation, Osaka, Japan; JCM: Japan Collection of Microorganisms, Institute of Physical and Chemical Research, Wako, Japan; MCC: Microbial Culture Collection, Pune, India; NFCCI: National Fungal Culture Collection of India, New Delhi, India; NRRL: Agricultural Research Service Culture Collection (NRRL - Northern Regional Research Laboratory) Database, Lubbock, Texas, USA; RV: Collection of Leptospira Strains, Higher Institute of Sanita, Roma-Nomentano, Italy; UAMH: Center for Global Microfungal Biodiversity, Dalla Lana School of Public Health, University of Toronto, Toronto, Canada. <sup>2</sup>ITS: Internal transcribed spacer region of the rDNA and 5.8S region; LSU: Large subunit region of the rDNA; *tub2*: partial  $\beta$ -tubulin gene; *rpb2*: the DNA dependent RNA polymerase II largest subunit. Known species identified in this study and taxonomic novelties proposed are in bold. <sup>T</sup> indicates ex-type strains, <sup>IT</sup> indicates ex-isotype strains, <sup>NT</sup> indicates ex-neotype strains.

## REFERENCES

8. Kandemir H, Dukik K, de Melo Teixeira M, Stielow JB, Delma FZ, Al-Hatmi A, Ahmed SA, Ilkit M, De Hoog GS. 2022. Phylogenetic and ecological reevaluation of the order *Onygenales*. *Fungal Diversity* 1–72. <https://doi.org/10.1007/s13225-022-00506-z>.
14. Dukik K, Muñoz JF, Jiang Y, Feng P, Sigler L, Stielow JB, de Hoog S. 2017. Novel taxa of thermally dimorphic systemic pathogens in the *Ajellomycetaceae* (*Onygenales*). *Mycoses* 60: 296–309. <https://doi.org/10.1111/myc.12601>.
15. Sharma R, Shouche YS. 2020. Diversity of onygenalean fungi in keratin-rich habitats of Maharashtra (India) and description of three novel taxa. *Mycopathologia* 185: 67–85. <https://doi.org/10.1007/s11046-019-00346-7>.
36. Vidal P, Ulfing K, Valmaseda M, Guarro J. 1999. Studies on keratinophilic fungi. XI. *Chrysosporium undulatum* sp. nov. *Antonie van Leeuwenhoek* 75: 171–182. <https://doi.org/10.1023/A:1001734015104>.
37. Marin-Felix Y, Stchigel AM, Cano-Lira JF, Sanchis M, Mayayo E, Guarro J. 2015. Emmonsiiellopsis, a new genus related to the thermally dimorphic fungi of the family Ajellomycetaceae. *Mycoses* 58: 451–460. <https://doi.org/10.1111/myc.12336>.
38. Crous PW, Wingfield MJ, Lombard L, Roets F, Swart WJ, Alvarado P, Carnegie AJ, Moreno G, Luangsa-ard J, Thangavel R, et al. 2019. Fungal Planet description sheets: 951–1041. *Persoonia: Molecular Phylogeny and Evolution of Fungi* 43: 223–425. <https://doi.org/10.3767/persoonia.2019.43.06>.
46. Sun YGZ, Chen AJ, Houbraken J. 2019. Phylogeny and a new species of the genus *Arachnomycetes* (Arachnomycetaceae). *Phytotaxa* 394: 089–097. <https://doi.org/10.11646/phytotaxa.394.1.6b>.
48. Peterson SW, Sigler L. 1998. Molecular genetic variation in *Emmonsia crescens* and *Emmonsia parva*, etiologic agents of adiaspiromycosis, and their phylogenetic relationship to *Blastomyces dermatitidis* (*Ajellomyces dermatitidis*) and other systemic fungal pathogens. *Journal of Clinical Microbiology* 36: 2918–2925. <https://doi.org/10.1128/jcm.36.10.2918-2925.1998>.
50. Untereiner WA, Scott JA, Naveau FA, Sigler L, Bachewich J, Angus A. 2004. The *Ajellomycetaceae*, a new family of vertebrate-associated *Onygenales*. *Mycologia* 96: 812–821. <https://doi.org/10.1080/15572536.2005.11832928>.
51. Rodríguez-Andrade E, Cano-Lira JF, Wiederhold N, Perez-Cantero, A, Guarro J, Stchigel AM. 2021. A revision of malbranchea-like fungi from clinical specimens in the United States of America reveals unexpected novelty. *IMA Fungus* 12. <https://doi.org/10.1186/s43008-021-00075-x>.

81. Giraldo A, Sutton DA, Gené J, Fothergill AW, Cano J, Guarro J. 2013. Rare arthroconidial fungi in clinical samples: *Scytalidium cuboideum* and *Arthrospira hispanica*. *Mycopathologia* 175: 115–121. <https://doi.org/10.1007/s11046-012-9590-3>.
83. Zhang ZF, Zhou SY, Eurwilaichitr L, Ingsriswang S, Raza M, Chen Q, Zhao P, Liu F, Cai L. 2021. Culturable mycobiota from Karst caves in China II, with descriptions of 33 new species. *Fungal Diversity* 106: 29–136. <https://doi.org/10.1007/s13225-020-00453-7>.
87. Giraldo A, Gené J, Sutton DA, Madrid H, Cano J, Crous PW, Guarro J. 2014. Phylogenetic circumscription of *Arthrographis* (*Eremomycetaceae*, *Dothideomycetes*). *Persoonia-Molecular Phylogeny and Evolution of Fungi* 32: 102–114. <http://dx.doi.org/10.3767/003158514X680207>.
95. Woodburn DB, Miller AN, Allender MC, Maddox CW, Terio KA. 2019. *Emydomyces testavorans*, a new genus and species of onygenalean fungus isolated from shell lesions of freshwater aquatic turtles. *Journal of Clinical Microbiology* 57: e00628-18. <https://doi.org/10.1128/JCM.00628-18>.
104. Lumbsch HT, Lindemuth R, Schmitt I. 2000. Evolution of filamentous ascomycetes inferred from LSU rDNA sequence data. *Plant Biology* 2: 525–529. <https://doi.org/10.1055/s-2000-7472>.
105. Wynns AA, Jensen AB, Eilenberg J, James R. 2012. *Ascospaera subglobosa*, a new spore cyst fungus from North America associated with the solitary bee *Megachile rotundata*. *Mycologia* 104: 108–114. <https://doi.org/10.3852/10-047>.
106. Vu D, Groenewald M, De Vries M, Gehrman T, Stielow B, Eberhardt U, Al-Hatmi A, Groenewald JZ, Cardinali G, Houbraken J, Boekhout T, Crous PW, Robert V, Verkley GJM. 2019. Large-scale generation and analysis of filamentous fungal DNA barcodes boosts coverage for kingdom fungi and reveals thresholds for fungal species and higher taxon delimitation. *Studies in Mycology* 92: 135–154. <https://doi.org/10.1016/j.simyco.2018.05.001>.
107. Vidal P, Vinuesa MDLA, Sánchez-Puelles JM, Guarro J. 2000. Phylogeny of the anamorphic genus *Chrysosporium* and related taxa based on rDNA internal transcribed spacer sequences. *Revista Iberoamericana de Micología* 17: 22–29.
108. Solé M, Cano J, Guarro J. 2002. Molecular taxonomy of *Amauroascus*, *Auxarthron* and other related genera of the *Onygenales*. *Mycological Research* 106: 388–396.
109. Schoch CL, Seifert KA, Huhndorf S, Robert V, Spouge JL, Levesque CA, Chen W, White MM. 2012. Nuclear ribosomal internal transcribed spacer (ITS) region as a universal DNA barcode marker for Fungi. *Proceedings of the National Academy of Sciences* 109: 6241–6246. <https://doi.org/10.1073/pnas.1117018109>.
110. Suankratay C, Dhissayakamol O, Uaprasert N, Chindamporn A. 2015. Invasive pulmonary infection caused by *Chrysosporium articulatum*: the first case report. *Mycoses* 58: 1–3. <https://doi.org/10.1111/myc.12270>.
111. Untereiner WA, Scott JA, Naveau FA, Bachewich J. 2002. Phylogeny of *Ajellomyces*, *Polytolypa* and *Spiromastix* (*Onygenaceae*) inferred from rDNA sequence and non-molecular data. *Studies in Mycology* 47: 25–35.
112. Zhang ZF, Liu F, Zhou X, Liu XZ, Liu SJ, Cai L. 2017. Culturable mycobiota from Karst caves in China, with descriptions of 20 new species. *Persoonia-Molecular Phylogeny and Evolution of Fungi* 39: 1–31. <https://doi.org/10.3767/persoonia.2017.39.01>.
113. Schoch CL, Robbertse B, Robert V, Vu D, Cardinali G, Irinyi L, Meyer W, Nilsson RH, Hughes K, Miller AN, et al. 2014. Finding needles in haystacks: linking scientific names, reference specimens and molecular data for Fungi. *Database*: 2014. <https://doi.org/10.1093/database/bau061>.
114. Nováková A, Kolařík M. 2010. *Chrysosporium speluncarum*, a new species resembling *Ajellomyces capsulatus*, obtained from bat guano in caves of temperate Europe. *Mycological Progress* 9: 253–260. <https://doi.org/10.1007/s11557-009-0634-0>.
115. Stielow JB, Lévesque CA, Seifert KA, Meyer W, Irinyi L, Smits D, Renfurm R, Verkley GJ, Groenewald M, Chaduli D, et al. 2015. One fungus, which genes? Development and assessment of universal primers for potential secondary fungal DNA barcodes. *Persoonia* 35: 242–63. <https://doi.org/10.3767/003158515X689135>.
116. Brasch J, Gräser Y. 2005. *Trichophyton eboreum* sp. nov. isolated from human skin. *Journal of Clinical Microbiology* 43: 5230–5237. <https://doi.org/10.1128/jcm.43.10.5230-5237.2005>.
117. Sugiyama M, Mikawa T. 2001. Phylogenetic analysis of the non-pathogenic genus *Spiromastix* (*Onygenaceae*) and related onygenalean taxa based on large subunit ribosomal DNA sequences. *Mycoscience* 42: 413–421. <https://doi.org/10.1007/BF02464337>.
118. Gueidan C, Villaseñor CR, De Hoog GS, Gorbushina AA, Untereiner WA, Lutzoni F. 2008. A rock-inhabiting ancestor for mutualistic and pathogen-rich fungal lineages. *Studies in Mycology* 61: 111–119. <https://doi.org/10.3114/sim.2008.61.11>.
119. Rangel-Grimaldo M, Macías-Rubalcava ML, González-Andrade M, Raja H, Figueroa M, Mata R. 2020.  $\alpha$ -Glucosidase and protein tyrosine phosphatase 1B inhibitors from *Malbranchea circinata*. *Journal of Natural Products* 83: 675–683. <https://doi.org/10.1021/acs.jnatprod.9b01108>.



120. Sigler L, Hambleton S, Flis AL, Pare JA. 2002. *Auxarthron* teleomorphs for *Malbranchea filamentosa* and *Malbranchea albolutea* and relationships within *Auxarthron*. *Studies in Mycology* 47: 111–122.
121. Crous PW, Wingfield MJ, Guarro J, Cheewangkoon R, Van der Bank M, Swart WJ, Stchigel AM, Cano-Lira JF, Roux J, Madrid H, et al. 2013. Fungal Planet description sheets: 154–213. *Persoonia-Molecular Phylogeny and Evolution of Fungi* 31: 188–296. <https://doi.org/10.3767/003158513X675925>.
122. Gräser Y, El Fari M, Vilgalys R, Kuijpers AFA, De Hoog GS, Presber W, Tietz HJ. 1999. Phylogeny and taxonomy of the family Arthrodermataceae (dermatophytes) using sequence analysis of the ribosomal ITS region. *Medical Mycology* 37: 105–114. <https://doi.org/10.1080/02681219980000171>.
123. Crous PW, Wingfield MJ, Burgess TI, Hardy GSJ, Barber PA, Alvarado P, Barnes CW, Buchanan PK, Heykoop M, Moreno G, et al. 2017. Fungal Planet description sheets: 558–624. *Persoonia: Molecular Phylogeny and Evolution of Fungi* 38: 240. <https://doi.org/10.3767/003158517X698941>.
124. Irinyi L, Serena C, Garcia-Hermoso D, Arabatzis M, Desnos-Ollivier M, Vu D, Cardinali G, Arthur IA, Normand AC, Giraldo A, et al. 2015. International Society of Human and Animal Mycology (ISHAM)-ITS reference DNA barcoding database—the quality controlled standard tool for routine identification of human and animal pathogenic fungi. *Medical Mycology* 53: 313–337. <https://doi.org/10.1093/mmy/myv008>.
125. Hirooka Y, Tanney JB, Nguyen HD, Seifert KA. 2016. Xerotolerant fungi in house dust: taxonomy of *Spiromastix*, *Pseudospiromastix* and *Sigleria* gen. nov. in *Spiromastigaceae* (*Onygenales*, *Eurotiomycetes*). *Mycologia* 108: 135–156. <https://doi.org/10.3852/15-065>.
126. Stchigel AM, Sutton DA, Cano-Lira JF, Wiederhold N, Guarro J. 2017. New species *Spiromastigoides albida* from a lung biopsy. *Mycopathologia* 182: 967–978. <https://doi.org/10.1007/s11046-017-0179-8>.
127. Rizzo L, Sutton DA, Wiederhold NP, Thompson EH, Friedman R, Wickes BL, Cano-Lira JF, Stchigel AM, Guarro J. 2014. Isolation and characterisation of the fungus *Spiromastix asexualis* sp. nov. from discospondylitis in a German Shepherd dog, and review of *Spiromastix* with the proposal of the new order *Spiromastixales* (*Ascomycota*). *Mycoses* 57: 419–428. <https://doi.org/10.1111/myc.12178>.
128. Heidemann S, Monod M, Gräser Y. 2010. Signature polymorphisms in the internal transcribed spacer region relevant for the differentiation of zoophilic and anthropophilic strains of *Trichophyton interdigitale* and other species of *T. mentagrophytes* sensu lato. *British Journal of Dermatology* 162: 282–295. <https://doi.org/10.1111/j.1365-2133.2009.09494.x>.

**Table S2:** Environmental and biogeographical information contained in all ITS1/ITS2 sequences downloaded from GlobalFungi database included in our analysis (see Fig. 4).

| Hypothetical taxa              | Sequence                         | ITS <sup>1</sup> | Sample ID <sup>2</sup> | Primers               | Longitude | Latitude  | Sample type      | ITS observed <sup>3</sup> | ITS total <sup>4</sup> | Freq R. <sup>5</sup> | Biome     | MAT <sup>6</sup> | MAP <sup>7</sup> | Ph    | Geographical Origin | Dominant plants               |
|--------------------------------|----------------------------------|------------------|------------------------|-----------------------|-----------|-----------|------------------|---------------------------|------------------------|----------------------|-----------|------------------|------------------|-------|---------------------|-------------------------------|
| <i>Albidomyces albicans</i>    | b1676d95bf4d8bef02e8d020daf54120 | ITS1             | 48285                  | ITS1ngs/ITS4ngs       | 21.8955°  | 58.3267°  | Soil             | 2                         | 2564                   | 0.7800               | Grassland | 7                | 581              | NA    | Estonia             | <i>Platanthera chlorantha</i> |
|                                | 0ce42d77ac661aba7f517be3cb04cd8  | ITS1             | 44192                  | ITS9MUNngs/ITS4ngsUni | 25.8776°  | 57.8607°  | Soil             | 1                         | 756                    | 1.3227               | Forest    | 5.8              | 660              | NA    | Estonia             | NA                            |
|                                | 61d71d93f69bcd47883fdec679f54917 | ITS1             | 30649                  | ITS9MUNngs/ITS4ngsUni | 15.4480°  | 50.1600°  | Soil             | 2                         | 8462                   | 0.2363               | Forest    | 9.1              | 614              | NA    | Czech Republic      | NA                            |
|                                | fc7e4c63b3e83ce3aff00e23ad87ff8  | ITS1             | 26926                  | ITS9MUNngs/ITS4ngsUni | 24.1268°  | 59.3655°  | Soil             | 2                         | 3207                   | 0.6236               | Urban     | 6.1              | 583              | NA    | Estonia             | NA                            |
|                                | a178fbfb8d85a2a178146e77563b404b | ITS1             | 22060                  | ITS9MUNngs/ITS4ngsUni | 23.5513°  | 58.5621°  | Soil             | 1                         | 15100                  | 0.0662               | Forest    | 6.6              | 587              | NA    | Estonia             | NA                            |
|                                | 357f72f9698f744f4f56bbd7ffefc8ed | ITS1             | 39251                  | ITS9MUNngs/ITS4ngsUni | 22.9943°  | 56.7230°  | Soil             | 5                         | 4890                   | 1.0224               | Forest    | 6.7              | 596              | NA    | Latvia              | NA                            |
|                                | 54e1a2cd6e91fbd67a7b79e3861bb0dd | ITS1             | 38105                  | ITS9MUNngs/ITS4ngsUni | 21.8665°  | 58.2811°  | Soil             | 1                         | 3291                   | 0.3038               | Forest    | 7.1              | 569              | NA    | Estonia             | NA                            |
|                                | 678fddf2957f93724d265d14a821430e | ITS1             | 8733                   | ITS9MUNngs/ITS4ngsUni | 23.6570°  | 58.7351°  | Soil             | 2                         | 6681                   | 0.2993               | Forest    | 6.5              | 607              | NA    | Estonia             | NA                            |
|                                | 1a354922ef3c78fb6658ee5e8d17a3b4 | ITS1             | 20390                  | ITS9MUNngs/ITS4ngsUni | 22.8187°  | 58.2806°  | Soil             | 2                         | 4226                   | 0.4732               | Forest    | 6.9              | 575              | NA    | Estonia             | NA                            |
|                                | 553722bf58a45389bc3da13c70ac1ecf | ITS1             | 38221                  | ITS9MUNngs/ITS4ngsUni | 24.5047°  | 59.3545°  | Soil             | 1                         | 3706                   | 0.2698               | Forest    | 5.9              | 650              | NA    | Estonia             | NA                            |
|                                | 174926d143ff672eb12c4e029d299bd9 | ITS2             | 17775                  | ITS1F/ITS4            | 9.34944   | 48.4969   | Soil             | 6                         | 6549                   | 0.9161               | Forest    | 7.5              | 974              | NA    | Germany             | NA                            |
|                                | cdda15ba6b511e0df271275e2491f4eb | ITS2             | 10310                  | ITS9MUNngs/ITS4ngsUni | 14.5822°  | 49.6684°  | Soil             | 304                       | 15920                  | 19.0954              | Forest    | 8.4              | 524              | NA    | Czech Republic      | NA                            |
|                                | 1a039be70e4b8b6370a4a1957d1a1904 | ITS2             | 29631                  | gITS7/ITS4            | 16.6541°  | 49.3214°  | Soil             | 7                         | 11273                  | 0.6209               | Forest    | 8.5              | 593              | NA    | Czech Republic      | NA                            |
|                                | b8f0b52dd6f8d36d54bdf8f734a52a2d | ITS2             | 8024                   | flITS7/ITS4           | -1.3200°  | 51.7700°  | Rhizosphere soil | 52                        | 20172                  | 2.5778               | Forest    | 9.9              | 707              | 6.3   | UK                  | <i>Fraxinus excelsior</i>     |
|                                | 1599a6077fe08c03c8852c2b5037faa5 | ITS2             | 31471                  | flITS7/ITS4           | -1.3300°  | 51.7800°  | Soil             | 62                        | 12387                  | 5.0052               | Forest    | 10               | 698              | 6.2   | UK                  | <i>Acer pseudoplatanus</i>    |
|                                | abf78b869c16b36ec973096c845ea7a9 | ITS2             | 10149                  | flITS7/ITS4           | -1.3300°  | 51.7800°  | Rhizosphere soil | 25                        | 19089                  | 1.3096               | Forest    | 10               | 698              | 5.9   | UK                  | <i>Acer pseudoplatanus</i>    |
|                                | 050642e91f2b94c6a0ba6701f2233c6d | ITS2             | 20802                  | flITS7/ITS4           | 9.45795°  | 48.4013°  | Soil             | 18                        | 64498                  | 0.2790               | Grassland | 7.8              | 903              | 5.19  | Germany             | NA                            |
|                                | 39ec84a6c40ce4ed1729e50e0f16d5ea | ITS2             | 13560                  | ITS9MUNngs/ITS4ngsUni | 23.5899°  | 58.9349°  | Soil             | 2                         | 4073                   | 0.4910               | Woodland  | 6.5              | 604              | NA    | Estonia             | NA                            |
|                                | 6bf32f8f10881becd7a8a312a6e535de | ITS2             | 8024                   | flITS7/ITS4           | -1.3200°  | 51.7700°  | Rhizosphere soil | 52                        | 20172                  | 2.5778               | Forest    | 9.9              | 707              | 6.3   | UK                  | <i>Fraxinus excelsior</i>     |
|                                | 73c0f79ba3abf2af53d348ae51cccc78 | ITS2             | 19751                  | flITS7/ITS4           | 10.4329°  | 50.9981°  | Soil             | 7                         | 28012                  | 0.2498               | Grassland | 8.7              | 713              | 7.255 | Germany             | NA                            |
|                                | 3d73800dc4c65b66ebc438ac1078b533 | ITS1             | 1583                   | ITS1F/ITS4            | 149.5980° | -30.2007° | Soil             | 13                        | 241414                 | 0.0538               | Cropland  | 19.3             | 600              | 7.5   | Australia           | NA                            |
|                                | 908c5761a9164af02b08ef3d83349d08 | ITS1             | 2627                   | ITS1F/ITS4            | 149.5970° | -30.2017° | Soil             | 6                         | 107526                 | 0.0558               | Cropland  | 19.3             | 600              | 7.6   | Australia           | NA                            |
| <i>Amaurascopsis perforata</i> | b512deed3bd31f9b201c5a2c2d990206 | ITS1             | 1583                   | ITS1F/ITS4            | 149.5980° | -30.2007° | Soil             | 13                        | 241414                 | 0.0538               | Cropland  | 19.3             | 600              | 7.5   | Australia           | NA                            |
|                                | f640f18c3f6b36657dd41f5a0a29a184 | ITS1             | 1906                   | ITS1F/ITS4            | 149.5970° | -30.2005° | Soil             | 112                       | 260362                 | 0.4301               | Cropland  | 19.3             | 600              | 7.6   | Australia           | NA                            |
|                                | c7c55ca82c572aee52fb09878c6b6ff  | ITS1             | 5523                   | ITS1F/ITS4            | 149.5970° | -30.2007° | Soil             | 9                         | 156916                 | 0.0573               | Cropland  | 19.3             | 600              | 7.6   | Australia           | NA                            |
|                                | 7e9137318c201f5f9a41c2916be60068 | ITS1             | 7440                   | ITS1F/ITS4            | 149.5970° | -30.2012° | Soil             | 29                        | 246980                 | 0.1174               | Cropland  | 19.3             | 600              | 7.6   | Australia           | NA                            |
|                                | b7e54bc230a3d6c46a364c05c01e585c | ITS1             | 6165                   | ITS1F/ITS4            | 149.5970° | -30.2014° | Soil             | 23                        | 317254                 | 0.0724               | Cropland  | 19.3             | 600              | 7.8   | Australia           | NA                            |
|                                | 149a10fb0e7db6cf7d49bcd84397b62  | ITS1             | 26271                  | ITS1F/ITS4            | 149.5970° | -30.2007° | Soil             | 6                         | 107526                 | 0.0558               | Cropland  | 19.3             | 600              | 7.6   | Australia           | NA                            |
|                                | 22d69106778c53e0e8946c073ec2ea0e | ITS1             | 1906                   | ITS1F/ITS4            | 149.5970° | -30.2005° | Soil             | 112                       | 260362                 | 0.4301               | Cropland  | 19.3             | 600              | 7.6   | Australia           | NA                            |
|                                | a29f598a9bd2986b15399f72c4c06874 | ITS1             | 5523                   | ITS1F/ITS4            | 149.5970° | -30.2007° | Soil             | 9                         | 156916                 | 0.0573               | Cropland  | 19.3             | 600              | 7.6   | Australia           | NA                            |
|                                | b3ba4ecea6a771b3899230555c72ac28 | ITS2             | 29359                  | flITS7/ITS4           | 139.5400° | 35.8400°  | Soil             | 16                        | 15573                  | 1.0274               | Cropland  | 15.5             | 1452             | 5.8   | Japan               | <i>Dactylis glomerata</i>     |
|                                | 998d416b16b2a109da72efa879c3fbb  | ITS2             | 29359                  | flITS7/ITS4           | 139.5400° | 35.8400°  | Soil             | 16                        | 15573                  | 1.0274               | Cropland  | 15.5             | 1452             | 5.8   | Japan               | <i>Dactylis glomerata</i>     |
|                                | 4ad3615b1b1d5fe224922ea168dbf1f2 | ITS2             | 29359                  | flITS7/ITS4           | 139.5400° | 35.8400°  | Soil             | 16                        | 15573                  | 1.0274               | Cropland  | 15.5             | 1452             | 5.8   | Japan               | <i>Dactylis glomerata</i>     |
|                                | 7310e8324907dc77bd3df72ba1c5f30a | ITS2             | 29359                  | flITS7/ITS4           | 139.5400° | 35.8400°  | Soil             | 16                        | 15573                  | 1.0274               | Cropland  | 15.5             | 1452             | 5.8   | Japan               | <i>Dactylis glomerata</i>     |

|                            |                                   |      |       |                                   |           |           |          |      |         |         |           |      |       |      |                   |                                   |
|----------------------------|-----------------------------------|------|-------|-----------------------------------|-----------|-----------|----------|------|---------|---------|-----------|------|-------|------|-------------------|-----------------------------------|
| Apinisia racovitzae        | 4abd7f60b3103c28d95e568020b6ed7c  | ITS2 | 29359 | flITS7/ITS4                       | 139.5400° | 35.8400°  | Soil     | 16   | 15573   | 1.0274  | Cropland  | 15.5 | 1452  | 5.8  | Japan             | <i>Dactylis glomerata</i>         |
|                            | 51d23f0ced558145a98253a6cda44042  | ITS2 | 29359 | flITS7/ITS4                       | 139.5400° | 35.8400°  | Soil     | 16   | 15573   | 1.0274  | Cropland  | 15.5 | 1452  | 5.8  | Japan             | <i>Dactylis glomerata</i>         |
|                            | 88f8a9eb6f800f1bdb954224d03e520d  | ITS2 | 266   | ITS1F/ITS4                        | 140.6960° | -34.0597° | Soil     | 98   | 1816901 | 0.0539  | Shrubland | 17.6 | 246   | 9    | Australia         | NA                                |
|                            | 4d4068d48942e41219d09e788c4abbba  | ITS2 | 266   | ITS1F/ITS4                        | 140.6960° | -34.0597° | Soil     | 98   | 1816901 | 0.0539  | Shrubland | 17.6 | 246   | 9    | Australia         | NA                                |
|                            | 72822cd7b8841ae8c528d23a9607bc50  | ITS2 | 266   | ITS1F/ITS4                        | 140.6960° | -34.0597° | Soil     | 98   | 1816901 | 0.0539  | Shrubland | 17.6 | 246   | 9    | Australia         | NA                                |
|                            | 911d4b750e1dd09b02698e7fd09b8494  | ITS2 | 266   | ITS1F/ITS4                        | 140.6960° | -34.0597° | Soil     | 98   | 1816901 | 0.0539  | Shrubland | 17.6 | 246   | 9    | Australia         | NA                                |
| Arachnotheca glomerata     | e1839424b9a0697f307ab8ad791b0172  | ITS2 | 266   | ITS1F/ITS4                        | 140.6960° | -34.0597° | Soil     | 98   | 1816901 | 0.0539  | Shrubland | 17.6 | 246   | 9    | Australia         | NA                                |
|                            | fd0cc1200ebba95d06e995052925fcc5  | ITS1 | 12918 | ITS1F/ITS4                        | -53.9319° | -25.8345° | Root     | 5    | 56369   | 0.0887  | Cropland  | 20.9 | 2066  | 6.52 | Argentina         | <i>Ilex paraguayensis</i>         |
|                            | 183957978e865bf62e4e7ad84b22112b  | ITS1 | 2259  | ITS1F/ITS2                        | 114.0870° | 31.8661°  | Soil     | 285  | 70954   | 4.0166  | Forest    | 15.3 | 1016  | 4.18 | China             | <i>Quercus acutissima</i>         |
|                            | abe274ec2bb1d9753f61e5a713382027  | ITS1 | 23556 | ITS5/ITS2                         | 117.0100° | 27.6600°  | Soil     | 2    | 19664   | 0.1017  | Forest    | 18.5 | 1737  | 4.53 | China             | <i>Phyllostachys pubescens</i>    |
|                            | 399ada34b884e9ae275a4e0f9c1e28da  | ITS1 | 21395 | ITS1F/ITS4                        | -54.1797° | -25.8669° | Root     | 4    | 31695   | 0.1262  | Cropland  | 20.9 | 1992  | 6    | Argentina         | <i>Ilex paraguayensis</i>         |
|                            | f98624a4a319927338c8734e74494b6e  | ITS1 | 322   | ITS1F/ITS2                        | 110.4940° | 31.3225°  | Soil     | 4    | 40932   | 0.0977  | Forest    | 10.1 | 1343  | 7.4  | China             | <i>Pinus tabuliformis</i>         |
|                            | d9183653c8bf198a4d719e000b9bfc8a  | ITS1 | 2259  | ITS1F/ITS2                        | 114.0870° | 31.8661°  | Soil     | 285  | 70954   | 4.0166  | Forest    | 15.3 | 1016  | 4.18 | China             | <i>Pinus tabuliformis</i>         |
|                            | ed2e9afeee0d682ee8592b31ac20d147  | ITS1 | 31509 | ITS1F/ITS2                        | 119.4370° | 30.3315°  | Soil     | 471  | 43429   | 10.8452 | Forest    | 14.5 | 1919  | 4.59 | China             | <i>Acer henry</i>                 |
|                            | e9a22612a48a86146d593d45eb6016c3  | ITS1 | 26962 | ITS1F/ITS2                        | 114.0870° | 31.8661°  | Soil     | 6    | 64425   | 0.0931  | Forest    | 15.3 | 1016  | 4.18 | China             | <i>Quercus acutissima</i>         |
|                            | a76c3d4a76d7ecb10841f5f628ebd1e2  | ITS1 | 16287 | ITS1F/ITS2                        | 147.3500° | -9.4447°  | Soil     | 1    | 39759   | 0.0251  | Forest    | 25.8 | 1969  | 4.46 | Papuna New Guinea | <i>Castanopsis acuminatissima</i> |
|                            | d2835fa37e36fcc11abc77c13fb6fba1  | ITS1 | 7638  | ITS1F/ITS2                        | -95.0800° | 18.5800°  | Soil     | 4    | 47885   | 0.0835  | Forest    | 23.7 | 31.55 | NA   | Mexico            | <i>Astrocaryum mexicanum</i>      |
|                            | c05a88469ce82b722db9e7d21496964c  | ITS2 | 14553 | glITS7ngs/ITS4ngsUni              | 101.0200° | 24.5300°  | Top soil | 208  | 268230  | 0.7754  | Forest    | 12.9 | 1557  | NA   | China             | NA                                |
|                            | 3306decc986eae2330d581ba38d1a4be  | ITS2 | 4916  | glITS7ngs/ITS4ngsUni              | 101.5700° | 21.6100°  | Top soil | 67   | 978478  | 0.0684  | Forest    | 21.6 | 1418  | NA   | China             | NA                                |
|                            | d6f3fb942590dfd6d2d8cd6cf6122cf59 | ITS2 | 1121  | glITS7ngs/ITS4ngsUni              | 101.0200° | 24.5300°  | Top soil | 1    | 1121182 | 0.0008  | Forest    | 12.9 | 1557  | NA   | China             | NA                                |
|                            | 8cdc9982113fe617b4d61e2aa367f4a8  | ITS2 | 2163  | glITS7ngs/ITS4ngsUni              | 101.5700° | 21.6100°  | Top soil | 1245 | 1360471 | 0.9151  | Forest    | 21.6 | 1418  | NA   | China             | NA                                |
|                            | 260703140f71bee9a845306e067b7830  | ITS2 | 22762 | glITS7ngs/ITS4ngsUni              | 101.5700° | 21.6100°  | Top soil | 32   | 19349   | 1.6538  | Forest    | 21.6 | 1418  | NA   | China             | NA                                |
|                            | 316723638a37c2373ad76cbcc203a2db  | ITS2 | 4611  | glITS7ngs/ITS4ngsUni              | 101.5700° | 21.6100°  | Top soil | 69   | 765894  | 0.0900  | Forest    | 21.6 | 1418  | NA   | China             | NA                                |
|                            | 68642a10c8d66aee940cd8ce3fa2a4ee  | ITS2 | 12361 | flITS7/ITS4                       | -72.2079° | 42.5084°  | Soil     | 83   | 157622  | 0.5265  | Forest    | 9.1  | 1280  | 5.2  | USA               | <i>Acer saccharum</i>             |
|                            | 7f3a45f20ba9d7aa0c7d643e3a4783b35 | ITS2 | 4832  | flITS9/ITS4                       | -89.3500° | 43.1333°  | Soil     | 12   | 137865  | 0.0870  | Grassland | 8.7  | 775   | 6.35 | USA               | <i>Panicum virgatum</i>           |
| Chrysosporium carmichaelii | cc3815a90fbc036d5563be38936da11e  | ITS2 | 18710 | glITS7ngs/ITS4ngsUni              | 101.5740° | 21.6120°  | Top soil | 18   | 29964   | 0.6007  | Forest    | 21.6 | 1418  | NA   | China             | NA                                |
|                            | dff2bb036a25a5094ddf39f7d74f64d   | ITS2 | 4512  | glITS7ngs/ITS4ngsUni              | 101.5700° | 21.6100°  | Top soil | 1892 | 552679  | 3.4233  | Forest    | 21.6 | 1418  | NA   | China             | NA                                |
|                            | 623de410f842c2b393a77a6e792b8f1f  | ITS1 | 32793 | ITS5/ITS2                         | 107.9260° | 34.5617°  | Soil     | 3    | 34480   | 0.0870  | Forest    | 11.7 | 798   | NA   | China             | <i>Robinia pseudoacacia</i>       |
|                            | 579b4b33e5d353dce86dad856bdabab6  | ITS1 | 18451 | ITS5/ITS2                         | 116.4800° | 39.8800°  | Air      | 1    | 49838   | 0.0200  | Urban     | 12.6 | 609   | NA   | China             | NA                                |
|                            | 9230c229f798d99988799c017d01c0cf  | ITS2 | 21478 | ITS3/ITS4                         | 117.7190° | 36.9467°  | Soil     | 1    | 108645  | 0.0092  | Cropland  | 13.6 | 624   | NA   | China             | <i>Triticum aestivum</i>          |
|                            | e0b81c3305edab66c9a96b110f2475b0  | ITS2 | 4269  | ITS86F/ITS4                       | -3.7251°  | 40.4460°  | Air      | 1    | 145405  | 0.0068  | Urban     | 14.8 | 513   | NA   | Spain             | NA                                |
|                            | ce596f2aeae6daf4bd9b1f86dd0a2c15  | ITS2 | 7507  | ITS3_KYO2/ITS4                    | -99.1761° | 19.3264°  | Air      | 2    | 97838   | 0.0204  | Urban     | 16.4 | 927   | NA   | Mexico            | NA                                |
|                            | 9a20c196e3bce863ba7722ecd7b945d6  | ITS2 | 19143 | ITS3ngs1 to 5 + ITS3ngs10/ITS4ngs | 121.4000° | 34.0000°  | Water    | 3    | 14534   | 0.2064  | Aquatic   | NA   | NA    | NA   | China             | NA                                |
|                            | 346a4c389d997812a4cd7771c7152c6e  | ITS2 | 21452 | ITS3/ITS4                         | 117.7050° | 37.0293°  | Soil     | 4    | 70545   | 0.0567  | Cropland  | 13.5 | 638   | NA   | China             | NA                                |
|                            | 9def6bc05d6636b59461ce0e70b657f7  | ITS2 | 37654 | ITS3ngs1 to 5 + ITS3ngs10/ITS4ngs | 122.3300° | 36.0000°  | Water    | 1    | 18230   | 0.0548  | Aquatic   | NA   | NA    | NA   | China             | NA                                |
|                            | b87ce203bdee7a520992103cc96b1ca2  | ITS2 | 19143 | ITS3ngs1 to 5 + ITS3ngs10/ITS4ngs | 121.4000° | 34.0000°  | Water    | 3    | 14534   | 0.2064  | Aquatic   | NA   | NA    | NA   | China             | NA                                |

|                                  |                                  |      |       |                                   |           |           |                  |     |        |        |           |      |      |      |                |                             |
|----------------------------------|----------------------------------|------|-------|-----------------------------------|-----------|-----------|------------------|-----|--------|--------|-----------|------|------|------|----------------|-----------------------------|
| <i>Chrysosporium chiropterum</i> | e1980d9fafeb0cc21b6a5a18d1925279 | ITS1 | 26731 | ITS1F/ITS4                        | 28.4889°  | -25.9278° | Soil             | 3   | 50047  | 0.0599 | Grassland | 16.1 | 706  | 6.5  | South Africa   | <i>Acacia dealbata</i>      |
|                                  | 02c4229e65aad67efd43bbe6725c164  | ITS1 | 17260 | ITS3_KYO2/ITS4                    | -2.77837° | 42.5060°  | Soil             | 23  | 83881  | 0.2741 | Cropland  | 12.9 | 735  | 8.2  | Spain          | <i>Vitis vinifera</i>       |
|                                  | 90181ed69e2c06f573e77f90cd70bfde | ITS1 | 11494 | ITS3_KYO2/ITS4                    | -2.8528°  | 42.5928°  | Root             | 21  | 123909 | 0.1694 | Cropland  | 13   | 598  | 8.2  | Spain          | <i>Vitis vinifera</i>       |
|                                  | 2d4f3dde60e993bfb72e2d1453ffc8e7 | ITS1 | 25873 | ITS5/ITS2                         | 108.4680° | 36.0740°  | Soil             | 1   | 51985  | 0.0192 | Cropland  | 8.8  | 625  | 8.33 | China          | <i>Zea mays</i>             |
|                                  | afc2ab4bba5a7fea8a294f9ba39c104a | ITS2 | 24407 | flITS7/ITS4                       | 9.3984°   | 48.3699°  | Soil             | 3   | 47464  | 0.0632 | Grassland | 7.9  | 792  | 6.15 | Germany        | NA                          |
|                                  | 7087f1c8f84ae8efca408fe0a0cd2d89 | ITS2 | 15173 | ITS3/ITS4                         | 128.4630° | 38.0321°  | Rhizosphere soil | 4   | 194956 | 0.0205 | Forest    | 8.1  | 1382 | 5.7  | South Korea    | <i>Carpinus cordata</i>     |
|                                  | 7087f1c8f84ae8efca408fe0a0cd2d89 | ITS2 | 15173 | ITS3/ITS4                         | 128.4630° | 38.0321°  | Rhizosphere soil | 4   | 194956 | 0.0205 | Forest    | 8.1  | 1382 | 5.7  | South Korea    | <i>Carpinus cordata</i>     |
|                                  | afc2ab4bba5a7fea8a294f9ba39c104a | ITS2 | 24407 | flITS7/ITS4                       | 9.3984°   | 48.3699°  | Soil             | 3   | 47464  | 0.0632 | Grassland | 7.9  | 792  | 6.15 | Germany        | NA                          |
| <i>Chrysosporium lobatum</i>     | c4ab8f17decdcb21ee81092e4561428  | ITS1 | 9875  | ITS5/ITS2                         | 107.9260° | 34.5567°  | Soil             | 1   | 21598  | 0.0463 | Forest    | 12   | 785  | NA   | China          | <i>Robinia pseudoacacia</i> |
|                                  | 21505d4a40c013eb54a57750f14c896  | ITS1 | 22495 | ITS1F/ITS2                        | 116.8260° | 28.2289°  | Soil             | 19  | 56117  | 0.3385 | Cropland  | 19.2 | 1748 | 5.53 | China          | <i>Oryza sativa</i>         |
|                                  | c064f9081f884a16cb3b7663bb778651 | ITS1 | 18934 | ITS5/ITS2                         | 117.2000° | 34.3400°  | Soil             | 103 | 82235  | 1.2525 | Cropland  | 14.7 | 842  | 7.79 | China          | <i>Zea mays</i>             |
|                                  | 98a48944c14e94e97e55407525653bc0 | ITS1 | 25066 | ITS5/ITS2                         | 116.4800° | 39.8800°  | Air              | 2   | 49992  | 0.0400 | Urban     | 12.6 | 609  | NA   | China          | NA                          |
|                                  | 6d9c45a27f39b09557727503aff1aad5 | ITS1 | 18934 | ITS5/ITS2                         | 117.2200° | 34.3400°  | Soil             | 103 | 82235  | 1.2525 | Cropland  | 14.7 | 842  | 7.79 | China          | <i>Zea mays</i>             |
|                                  | 6c11b5978d2a3869c90b0c0619218010 | ITS1 | 18934 | ITS5/ITS2                         | 117.2200° | 34.3400°  | Soil             | 103 | 82235  | 1.2525 | Cropland  | 14.7 | 842  | 7.79 | China          | <i>Zea mays</i>             |
|                                  | 40b3daa50de24d9bb0e7024d78614dd5 | ITS1 | 22495 | ITS1F/ITS2                        | 116.8260° | 28.2289°  | Soil             | 19  | 56117  | 0.3385 | Cropland  | 19.2 | 1748 | 5.53 | China          | <i>Oryza sativa</i>         |
|                                  | 258d0e5184ea34997c5bb22414dc0d09 | ITS1 | 22495 | ITS1F/ITS2                        | 116.8260° | 28.2289°  | Soil             | 19  | 56117  | 0.3385 | Cropland  | 19.2 | 1748 | 5.53 | China          | <i>Oryza sativa</i>         |
|                                  | 0ee0e5bb36477433a9273018b053e6ed | ITS1 | 22495 | ITS1F/ITS2                        | 116.8260° | 28.2289°  | Soil             | 19  | 56117  | 0.3385 | Cropland  | 19.2 | 1748 | 5.53 | China          | <i>Oryza sativa</i>         |
|                                  | 803926142f0412c70ffb625acf90442  | ITS1 | 24248 | ITS5/ITS2                         | 106.2200° | 38.3100°  | Soil             | 13  | 68262  | 0.1904 | Cropland  | 10.5 | 201  | 8.37 | China          | <i>Zea mays</i>             |
|                                  | 9e51dc2a8d2dc9b9b514b1b93a7dbaa3 | ITS2 | 22592 | ITS3ngs1 to 5 + ITS3ngs10/ITS4ngs | 120.7600° | 38.3459°  | Water            | 128 | 20989  | 6.0984 | Aquatic   | NA   | NA   | NA   | China          | NA                          |
|                                  | 6fce35a01b556394b40dbd2fe8f2e11  | ITS2 | 21465 | ITS3/ITS4                         | 113.0900° | 28.2000°  | Soil             | 1   | 15126  | 0.0661 | Cropland  | 18.4 | 1473 | 6.55 | China          | <i>Glycine max</i>          |
|                                  | 63ad5c9d4d09b84ccb50a59149397b47 | ITS2 | 22592 | ITS3ngs1 to 5 + ITS3ngs10/ITS4ngs | 120.7600° | 38.3459°  | Water            | 128 | 20989  | 6.0984 | Aquatic   | NA   | NA   | NA   | China          | NA                          |
|                                  | ecc0c76261ee19696608f181e3431227 | ITS2 | 22592 | ITS3ngs1 to 5 + ITS3ngs10/ITS4ngs | 120.7600° | 38.3459°  | Water            | 128 | 20989  | 6.0984 | Aquatic   | NA   | NA   | NA   | China          | NA                          |
|                                  | e9d6fb53070a18dc55e7a39fd4ddfba4 | ITS2 | 9936  | ITS3/ITS4                         | -83.9600° | 35.8400°  | Rhizosphere soil | 3   | 132473 | 0.0226 | Forest    | 14.9 | 1192 | NA   | China          | <i>Glycine max</i>          |
|                                  | 2c143f7424e2b36fbb351271fbe08c06 | ITS2 | 4606  | ITS3/ITS4                         | -83.9600° | 35.8400°  | Rhizosphere soil | 4   | 240124 | 0.0166 | Forest    | 14.9 | 1192 | NA   | USA            | <i>Populus deltoides</i>    |
|                                  | 4cab851e82c0d2b1e3f87280819a10d5 | ITS2 | 22592 | ITS3ngs1 to 5 + ITS3ngs10/ITS4ngs | 120.7600° | 38.3459°  | Water            | 128 | 20989  | 6.0984 | Aquatic   | NA   | NA   | NA   | China          | NA                          |
|                                  | d8255312c75e23089e99c9cf54b68e57 | ITS2 | 22592 | ITS3ngs1 to 5 + ITS3ngs10/ITS4ngs | 120.7600° | 38.3459°  | Water            | 128 | 20989  | 6.0984 | Aquatic   | NA   | NA   | NA   | China          | NA                          |
|                                  | 14c615c7de320ecd8d2fc3a333edb908 | ITS2 | 29732 | ITS3ngs1 to 5 + ITS3ngs10/ITS4ngs | 119.2040° | 38.3190°  | Water            | 1   | 110017 | 0.0090 | Aquatic   | NA   | NA   | NA   | China          | NA                          |
|                                  | 0228cc1f6afd028d3024891a776c5164 | ITS2 | 22592 | ITS3ngs1 to 5 + ITS3ngs10/ITS4ngs | 120.7600° | 38.3459°  | Water            | 128 | 20989  | 6.0984 | Aquatic   | NA   | NA   | NA   | China          | NA                          |
| <i>Chrysosporium pallidum</i>    | 546e8b62b169a16935c46b3c660456a0 | ITS2 | 34938 | ITS3/ITS4                         | 114.8560° | 37.8031°  | Rhizosphere soil | 1   | 50548  | 0.0197 | Cropland  | 14.5 | 521  | NA   | China          | NA                          |
| <i>Chrysosporium sulfureum</i>   | 6a4c0176bffb4b9b4cf8aa004cf2bf51 | ITS2 | 23040 | ITS3/ITS4                         | 10.4656°  | 51.1129°  | Air              | 2   | 24090  | 0.0830 | Forest    | 8.7  | 554  | NA   | Germany        | NA                          |
|                                  | 1d5f60a0df5cad7bc1561b0e2216efdd | ITS2 | 23040 | ITS3/ITS4                         | 10.4656°  | 51.1129°  | Air              | 2   | 24090  | 0.0830 | Forest    | 8.7  | 554  | NA   | Germany        | NA                          |
| <i>Chrysosporium undulatum</i>   | b1676d95bf4d8bef02e8d020daf54120 | ITS1 | 47114 | ITS9MUNngs/ITS4ngsUni             | 22.2143°  | 58.1157°  | Soil             | 6   | 2390   | 2.5104 | Forest    | 7    | 590  | NA   | Estonia        | NA                          |
|                                  | de1309038b56fb89abee5f547d87b0a2 | ITS1 | 22563 | ITS9MUNngs/ITS4ngsUni             | 14.8295°  | 49.7167°  | Soil             | 2   | 4657   | 0.4294 | Forest    | 8.5  | 549  | NA   | Czech Republic | NA                          |
|                                  | 0897ada14dc18abdd24ebdc3529fb391 | ITS1 | 18470 | ITS9MUNngs/ITS4ngsUni             | 12.9883°  | 49.5452°  | Soil             | 5   | 10479  | 0.4771 | Forest    | 8.4  | 730  | NA   | Czech Republic | NA                          |
|                                  | 092623792d0f2c47f4010f6b1f0b7f36 | ITS1 | 33900 | ITS9MUNngs/ITS4ngsUni             | 15.0201°  | 50.2907°  | Soil             | 12  | 9549   | 1.2566 | Forest    | 8.9  | 634  | NA   | Czech Republic | NA                          |
|                                  | 15023ddfdb03b16e622ff5e1fc1f8d23 | ITS1 | 26729 | ITS9MUNngs/ITS4ngsUni             | 14.1076°  | 49.4373°  | Soil             | 6   | 4997   | 1.2007 | Forest    | 8.6  | 546  | NA   | Czech Republic | NA                          |

|                                   |                                    |      |       |                       |            |           |                  |     |        |         |           |      |      |      |                |                              |
|-----------------------------------|------------------------------------|------|-------|-----------------------|------------|-----------|------------------|-----|--------|---------|-----------|------|------|------|----------------|------------------------------|
| <i>Malbranchea albolutea</i>      | 6c41ac7d66368aa24d4874ed0e0ce861   | ITS1 | 29460 | ITS9MUNngs/ITS4ngsUni | 26.8737°   | 57.9812°  | Soil             | 12  | 6605   | 1.8168  | Urban     | 5.4  | 621  | NA   | Estonia        | NA                           |
|                                   | 1b9f034469e42c55b17a79e50dac792b   | ITS1 | 26311 | ITS9MUNngs/ITS4ngsUni | 14.7831°   | 48.9399°  | Soil             | 10  | 39009  | 0.2563  | Forest    | 8.7  | 627  | NA   | Czech Republic | NA                           |
|                                   | 5517108db0442e11b505401ac9273cd8   | ITS1 | 22275 | ITS9MUNngs/ITS4ngsUni | 24.9002°   | 58.9071°  | Soil             | 1   | 8939   | 0.1118  | Forest    | 5.7  | 722  | NA   | Estonia        | NA                           |
|                                   | 7bb99f2ca2c88020ffdfcb739ba9536e   | ITS1 | 23342 | ITS9MUNngs/ITS4ngsUni | 12.6092°   | 50.0069°  | Soil             | 3   | 8615   | 0.3482  | Forest    | 7.1  | 757  | NA   | Czech Republic | NA                           |
|                                   | f2814c88e8dce322b35b32823f7a42f3   | ITS1 | 26311 | ITS9MUNngs/ITS4ngsUni | 14.7831°   | 48.9398°  | Soil             | 10  | 39009  | 0.2563  | Forest    | 8.7  | 627  | NA   | Czech Republic | NA                           |
|                                   | 72c90ba34eacb80756a14a0b130c651c   | ITS2 | 40688 | glITS7/ITS4           | 16.6541°   | 49.3214°  | Soil             | 1   | 5570   | 0.1795  | Forest    | 8.5  | 593  | 4.51 | Czech Republic | <i>Picea abies</i>           |
|                                   | a78576e908a8ce117ae54a908919faa8   | ITS2 | 47114 | ITS9MUNngs/ITS4ngsUni | 22.2143°   | 58.1570°  | Soil             | 6   | 2393   | 2.5073  | Forest    | 7    | 590  | NA   | Czech Republic | <i>Picea abies</i>           |
|                                   | 5e5d51e7eec6c594ff8109da8839fd2e   | ITS2 | 35933 | glITS7/ITS4           | 16.6488°   | 492.6160° | Litter           | 1   | 9353   | 0.1069  | Forest    | 8.8  | 558  | 6.5  | Czech Republic | <i>Picea abies</i>           |
|                                   | 257aa333e9795ac155fb2c42d56519b3   | ITS2 | 5981  | flITS7/ITS4           | 147.3880°  | -33.8449° | Soil             | 1   | 53832  | 0.0185  | Forest    | 16.8 | 470  | 6.74 | Australia      | NA                           |
|                                   | 0325a48229e0434caafe591724f16c50   | ITS2 | 27582 | glITS7/ITS4           | 14.7036°   | -48.6660° | Deadwood         | 2   | 21583  | 0.0926  | Forest    | 6.6  | 784  | 3.73 | Australia      | NA                           |
|                                   | c4d64d6c836a83e38ae2fbd2d85fc2a2   | ITS2 | 6814  | ITS1F/ITS4            | 9.4392°    | 48.3959°  | Rhizosphere soil | 3   | 74470  | 0.0402  | Grassland | 7.8  | 903  | NA   | Germany        | <i>Dactylis glomerata</i>    |
|                                   | 0199e4317cb7a44e1042779b92fe8867   | ITS2 | 9671  | glITS7/ITS4           | 16.6452°   | 49.3125°  | Soil             | 3   | 57454  | 0.0522  | Forest    | 9.2  | 485  | 5.43 | Czech Republic | <i>Fagus sylvatica</i>       |
|                                   | 4ba6ca174787dfe83a49995fa9e4e9c3   | ITS2 | 29544 | ITS9MUNngs/ITS4ngsUni | 14.5397°   | 49.9911°  | Soil             | 1   | 18500  | 0.0540  | Forest    | 8.7  | 559  | NA   | Czech Republic | NA                           |
|                                   | 698f5dc86e62d6e5322cefd0385ad20b   | ITS2 | 11271 | flITS7/ITS4           | 149.8880°  | -34.7437° | Soil             | 126 | 70143  | 1.7963  | Forest    | 13   | 680  | 5.52 | Australia      | NA                           |
|                                   | a21e601967f9974c2cdc98802c268cc2   | ITS2 | 31445 | TS9MUNngs/ITS4ngsUni  | 16.9944°   | 49.9760°  | Soil             | 9   | 16128  | 0.5580  | Forest    | 8.4  | 695  | NA   | Czech Republic | NA                           |
|                                   | 46997959ae9c1e4172414dc3893c61b0   | ITS1 | 12435 | ITS1F/ITS2            | 82.4000°   | 44.9000°  | Soil             | 794 | 45884  | 17.3045 | Desert    | 10.8 | 130  | 8.42 | China          | <i>Haloxylon ammodendron</i> |
|                                   | 146d3e6b4e8bf8a8b284d506f7b0044f   | ITS1 | 34411 | ITS1F/ITS4            | -0.5990°   | 39.8100°  | Soil             | 2   | 8745   | 0.2287  | Shrubland | 13.3 | 480  | 7.8  | Spain          | <i>Fagaceae</i>              |
|                                   | 16f07ffa4eec06a7e8a380f6ed48416    | ITS1 | 12435 | ITS1F/ITS2            | 82.4000°   | 44.9000°  | Soil             | 794 | 45884  | 17.3045 | Desert    | 10.8 | 130  | 8.42 | China          | <i>Haloxylon ammodendron</i> |
|                                   | 1d2c7a0fea0506e5fd175f3a3173ca6e   | ITS1 | 13287 | ITS1F/ITS2            | 91.1000°   | 43.7000°  | Soil             | 103 | 31564  | 3.2632  | Grassland | 4.6  | 118  | 7.9  | China          | <i>Stipa capillata</i>       |
|                                   | 25cb0da9798991f2905a4cca2539b0cf   | ITS1 | 12435 | ITS1F/ITS2            | 82.4000°   | 44.9000°  | Soil             | 794 | 45884  | 17.3045 | Desert    | 10.8 | 130  | 8.42 | China          | <i>Haloxylon ammodendron</i> |
| <i>Malbranchea californiensis</i> | 5857c3a95b20211fda7faa5e2a2b127b   | ITS1 | 11200 | ITS1F/ITS2            | 107.9200°  | 34.5600°  | Soil             | 9   | 50702  | 0.1775  | Forest    | 11.5 | 825  | NA   | China          | <i>Robinia pseudoacacia</i>  |
|                                   | 6eb3731c69b517de0ed3a5be8d6b4da0   | ITS1 | 37389 | ITS1F/ITS2            | 84.9000°   | 44.1000°  | Soil             | 1   | 35492  | 0.0281  | Grassland | 3.6  | 177  | 7.9  | China          | <i>Stipa capillata</i>       |
|                                   | 8670583bec42d296bc0a1a4c27f87c53   | ITS1 | 12435 | ITS1F/ITS2            | 82.4000°   | 44.9000°  | Soil             | 794 | 45884  | 17.3045 | Desert    | 10.8 | 130  | 8.42 | China          | <i>Haloxylon ammodendron</i> |
|                                   | a39aed4f0c8508d03e87a4e376a09e74   | ITS2 | 34205 | flITS7/ITS4           | -96.6122°  | 39.1020°  | Soil             | 1   | 20261  | 0.04935 | Grassland | 12.9 | 748  | 6.31 | USA            | <i>Juniperus virginiana</i>  |
|                                   | f350ebf031ee199def3bb8d278983d8d   | ITS2 | 9287  | flITS7/ITS4           | -3.5587°   | 33.9326°  | Soil             | 678 | 70531  | 9.6127  | Desert    | 18.6 | 292  | 8.48 | Morocco        | NA                           |
|                                   | 8c5104a2e7211a4ecff4d04644dfc6b1   | ITS2 | 15620 | flITS7/ITS4           | -110.5170° | 38.0031°  | Soil             | 35  | 139659 | 0.2506  | Shrubland | 13.9 | 120  | 8.88 | USA            | NA                           |
|                                   | 6805f6586043b848caa174d639a4721a   | ITS2 | 24732 | ITS4_Fun/5.8S_Fun     | -111.5680° | 35.5722°  | Soil             | 46  | 21121  | 2.1779  | Desert    | 12.3 | 284  | NA   | USA            | NA                           |
|                                   | 30874049868f2a52ad99a5e921bef5df   | ITS2 | 15620 | flITS7/ITS4           | -110.5170° | 38.0031°  | Soil             | 35  | 139659 | 0.2506  | Shrubland | 13.9 | 120  | 8.88 | USA            | NA                           |
|                                   | fc3ad7f45edf6483339157726ac51223   | ITS2 | 9287  | flITS7/ITS4           | -3.5587°   | 33.9326°  | Soil             | 678 | 70531  | 9.6127  | Desert    | 18.6 | 292  | 8.48 | Morocco        | NA                           |
|                                   | 41fdf6f4ed1bc9c509dbd75a47331033   | ITS2 | 20303 | flITS7/ITS4           | -1.9993°   | 34.3097°  | Soil             | 341 | 99995  | 3.4101  | Grassland | 14.9 | 234  | 8.31 | Morocco        | NA                           |
|                                   | d4589bc2af525efff8db27770d95e777f] | ITS2 | 16669 | flITS7/ITS4           | -2.3729°   | 34.1592°  | Soil             | 150 | 66491  | 2.2559  | Desert    | 16.4 | 278  | 8.30 | Morocco        | NA                           |
|                                   | 986d2513ffd366edd7fe143ea1aca01f]  | ITS2 | 9278  | flITS7/ITS4           | -1.9993°   | 34.3097°  | Soil             | 275 | 66131  | 4.1584  | Desert    | 14.9 | 324  | 8.36 | Morocco        | NA                           |
|                                   | d89b9e4c2b3d6b51441990f5132ca07e   | ITS2 | 12718 | flITS7/ITS4           | -112.5520° | 37.1134°  | Soil             | 406 | 126190 | 3.2173  | Shrubland | 12.3 | 265  | 8.44 | USA            | NA                           |
|                                   | ec466e9e168787b69805b9c461d33f2e   | ITS1 | 10840 | ITS5/5.8S_fungi       | -3.1166°   | 52.9072°  | Soil             | 109 | 213318 | 0.5109  | Grassland | 8.2  | 961  | 3.57 | UK             | NA                           |
|                                   | 1fcdc37fa2dd49a1df55867c5e2a474f   | ITS1 | 27215 | ITS9MUNngs/ITS4ngsUni | 13.8131°   | 48.9810°  | Soil             | 93  | 14704  | 6.3248  | Forest    | 5    | 1060 | NA   | Czech Republic | NA                           |
|                                   | d17efecd6f205c56536090e1d37b538b   | ITS1 | 22563 | ITS9MUNngs/ITS4ngsUni | 14.8295°   | 49.7167°  | Soil             | 2   | 4657   | 0.4294  | Forest    | 8.5  | 549  | NA   | Czech Republic | NA                           |

|                       |                                   |      |       |                                   |            |           |                           |      |         |         |           |      |      |      |                |                             |
|-----------------------|-----------------------------------|------|-------|-----------------------------------|------------|-----------|---------------------------|------|---------|---------|-----------|------|------|------|----------------|-----------------------------|
| Malbranchea chinensis | 512a1da49a8b46883a736f2166f6ec1   | ITS1 | 2939  | ITS1F/ITS2                        | 4.5610°    | 51.0720°  | Root                      | 1    | 83319   | 0.0120  | Forest    | 10.6 | 814  | 4.21 | Belgium        | <i>Quercus robur</i>        |
|                       | 38902800add46ef952539444b2fff787  | ITS1 | 13689 | ITS5/5.8S_fungi                   | -3.5434°   | 52.3630°  | Soil                      | 4    | 230670  | 0.0173  | Grassland | 7.7  | 1963 | 4.73 | UK             | NA                          |
|                       | 4e7eec86b15ef9c22de97c60958333fd  | ITS1 | 27215 | ITS9MUNngs/ITS4ngsUni             | 13.8131°   | 48.9810°  | Soil                      | 93   | 14704   | 6.3248  | Forest    | 5    | 1060 | NA   | Czech Republic | NA                          |
|                       | 4829f5243d075652da433cdf92925a28  | ITS1 | 27215 | ITS9MUNngs/ITS4ngsUni             | 13.8131°   | 48.9810°  | Soil                      | 93   | 14704   | 6.3248  | Forest    | 5    | 1060 | NA   | Czech Republic | NA                          |
|                       | 87b1fd3c3c9e5ff5260e18be31d3a636  | ITS1 | 27215 | ITS9MUNngs/ITS4ngsUni             | 13.8131°   | 48.9810°  | Soil                      | 93   | 14704   | 6.3248  | Forest    | 5    | 1060 | NA   | Czech Republic | NA                          |
|                       | 2a7b98ff57075d3468f5d49fef537ff3  | ITS1 | 27215 | ITS9MUNngs/ITS4ngsUni             | 13.8131°   | 48.9810°  | Soil                      | 93   | 14704   | 6.3248  | Forest    | 5    | 1060 | NA   | Czech Republic | NA                          |
|                       | 149b4d85d17769cbc1d67bb350cff3ab  | ITS1 | 27215 | ITS9MUNngs/ITS4ngsUni             | 13.8131°   | 48.9810°  | Soil                      | 93   | 14704   | 6.3248  | Forest    | 5    | 1060 | NA   | Czech Republic | NA                          |
|                       | 1b9d97117a12d57fd51242dba837eae   | ITS2 | 9651  | glts7ngs/ITS4ngsUni               | 101.0160°  | 24.5330°  | Top soil                  | 26   | 35061   | 0.7415  | Forest    | 13   | 1546 | NA   | China          | NA                          |
|                       | 93b48a19a9a56e3af058ed31a904f731  | ITS2 | 82752 | glts7ngs/ITS4ngsUni               | 101.0200°  | 24.5300°  | Top soil                  | 421  | 949101  | 0.4435  | Forest    | 12.9 | 1557 | NA   | China          | NA                          |
|                       | 06027f3e4e0301b2fc39759745356d85  | ITS2 | 6604  | glts7ngs/ITS4ngsUni               | 101.0200°  | 24.5300°  | Top soil                  | 5379 | 1199523 | 4.4842  | Forest    | 12.9 | 1557 | NA   | China          | NA                          |
|                       | 03b49e7c95f2eee274b8527cc0155e31  | ITS2 | 6604  | glts7ngs/ITS4ngsUni               | 101.0200°  | 24.5300°  | Top soil                  | 5379 | 1199523 | 4.4842  | Forest    | 12.9 | 1557 | NA   | China          | NA                          |
|                       | 1f673d5651ace6c9c3f8b7a523af0e33  | ITS2 | 106   | glts7ngs/ITS4ngsUni               | 101.0160°  | 24.5330°  | Top soil                  | 50   | 115411  | 0.4332  | Forest    | 13   | 1546 | NA   | China          | NA                          |
|                       | 57afd1bf8841015f97f9728088416b99  | ITS2 | 15225 | glts7ngs/ITS4ngsUni               | 101.0200°  | 24.5300°  | Top soil                  | 109  | 700669  | 0.1555  | Forest    | 12.9 | 1557 | NA   | China          | NA                          |
|                       | 5f891f54c11d1ca5360a24ee84dde92d  | ITS2 | 2556  | glts7ngs/ITS4ngsUni               | 101.0200°  | 24.5300°  | Top soil                  | 4    | 568348  | 0.0070  | Forest    | 12.9 | 1557 | NA   | China          | NA                          |
|                       | 88cff43503f9c8a0b9be5b52b31c177a  | ITS2 | 1199  | glts7ngs/ITS4ngsUni               | 101.0200°  | 24.5300°  | Top soil                  | 503  | 843445  | 0.5963  | Forest    | 12.9 | 1557 | NA   | China          | NA                          |
|                       | c901854d2ead1a26753299e4784d32fa  | ITS2 | 7217  | glts7ngs/ITS4ngsUni               | 101.0200°  | 24.5300°  | Top soil                  | 218  | 1006058 | 0.2166  | Forest    | 12.9 | 1557 | NA   | China          | NA                          |
|                       | d2dda8d887de629107c6b97ad67e1db8  | ITS2 | 6602  | glts7ngs/ITS4ngsUni               | 101.0200°  | 24.5300°  | Top soil                  | 5348 | 1263089 | 4.2340  | Forest    | 12.9 | 1557 | NA   | China          | NA                          |
|                       | 2c3d4f0c6bb747033d495d64002407ef  | ITS2 | 12973 | flITS9/ITS4                       | -70.8394°  | -27.4675° | Soil                      | 751  | 206768  | 3.6320  | Desert    | 16.8 | 26   | 9.24 | Chile          | <i>Cistanthe longiscapa</i> |
|                       | 4eca68b22046729655cd343214ffd9e3  | ITS2 | 17587 | flITS9/ITS4                       | -70.8394°  | -27.4676° | Root and Rhizosphere soil | 785  | 193894  | 4.0486  | Desert    | 16.8 | 26   | 9.24 | Chile          | <i>Cistanthe longiscapa</i> |
|                       | 56d65a3412420af5e562357db844af11  | ITS2 | 3493  | ITS3ngs1 to 5 + ITS3ngs10/ITS4ngs | 123.0000°  | 35.0000°  | Water                     | 2    | 14142   | 0.1414  | Marine    | NA   | NA   | NA   | China          | NA                          |
|                       | 5711d54dc1b835e020a0b8cb30f134b   | ITS2 | 1282  | ITS86F/ITS4                       | -2.9861°   | 37.0064°  | Rhizosphere soil          | 12   | 149311  | 0.0803  | Shrubland | 13.2 | 446  | 7.95 | Spain          | <i>Thymus zygis</i>         |
|                       | 66b7e126ab05193ddd26a24ea68eaa52  | ITS2 | 9292  | ITS86F/ITS4                       | -1.1627°   | 34.0334°  | Rhizosphere soil          | 1    | 137515  | 0.0072  | Shrubland | 18.5 | 299  | 8.46 | Spain          | <i>Thymalea hirsuta</i>     |
|                       | 7eff344b359457a4dff393af5d7d95fd  | ITS2 | 17587 | FLTS9/ITS4                        | -70.8394°  | -27.4676° | Root and Rhizosphere soil | 785  | 193894  | 4.0486  | Desert    | 16.8 | 26   | 9.24 | Chile          | <i>Cistanthe longiscapa</i> |
|                       | 8181f4f83d841895fb6a7b14fd03cf65  | ITS2 | 12973 | FLTS9/ITS4                        | -70.8394°  | -27.4675° | Soil                      | 751  | 206768  | 3.6320  | Desert    | 16.8 | 26   | 9.24 | Chile          | <i>Cistanthe longiscapa</i> |
|                       | 8f0f64ace6ef0240af70a206eb20247f  | ITS2 | 34938 | ITS3ngs1 to 5 + ITS3ngs10/ITS4ngs | 123.5000°  | 35.0000°  | Water                     | 2    | 14142   | 0.1414  | Aquatic   | NA   | NA   | NA   | China          | NA                          |
|                       | 9f9c306686a43a6ea38671dfd510547e  | ITS2 | 589   | Clts9/ITS4                        | 107.5000°  | 35.6700°  | Soil                      | 2215 | 213525  | 10.3734 | Desert    | NA   | NA   | NA   | China          | NA                          |
|                       | ee3be12b37d7cc6f7e0fecab6b4bbd5a  | ITS2 | 17587 | Clts9/ITS4                        | 107.5000°  | 35.6700°  | Root and Rhizosphere soil | 785  | 193894  | 4.0486  | Desert    | NA   | NA   | NA   | China          | NA                          |
| Malbranchea compacta  | 3441eb3dbd4bfff53efe53a4579fc6a20 | ITS1 | 10297 | ITS5/ITS4                         | -111.5680° | 35.5722°  | Soil                      | 21   | 4936    | 4.2544  | Desert    | 8.5  | 284  | 7.9  | China          | <i>Potentilla bifurca</i>   |
|                       | e659c8ae27cf0cd0de14465cf8f76613  | ITS1 | 6561  | ITS5/ITS4                         | -111.5680° | 35.5722°  | Soil                      | 22   | 6896    | 3.1902  | Desert    | 8.5  | 284  | 7.9  | China          | <i>Stipa grandis</i>        |
|                       | b5b1a4d1d6152cc1b56b0d2bb1fe3a98  | ITS1 | 9123  | ITS5/ITS4                         | -111.5680° | 35.5722°  | Soil                      | 7    | 4443    | 1.5755  | Desert    | 8.5  | 284  | 7.9  | China          | <i>Stipa grandis</i>        |
|                       | 160729c8b1e82065696f07dbe9bd6daa  | ITS1 | 30540 | ITS5/ITS4                         | -111.5680° | 35.5722°  | Soil                      | 2    | 5845    | 0.3421  | Desert    | 8.5  | 284  | 7.9  | China          | <i>Bouteloua eriopoda</i>   |
|                       | 3653cf5ee48e5bad251acd299a91712b  | ITS1 | 20253 | ITS5/ITS4                         | -111.5680° | 35.5722°  | Soil                      | 5    | 7741    | 0.6459  | Desert    | 8.5  | 284  | 7.9  | China          | <i>Bouteloua eriopoda</i>   |
|                       | 4e7433e58d6d971bfcf47acfa6929efd  | ITS1 | 10297 | ITS5/ITS4                         | -111.5680° | 35.5722°  | Soil                      | 21   | 4936    | 4.2544  | Desert    | 8.5  | 284  | 7.9  | China          | <i>Bouteloua eriopoda</i>   |
|                       | 936d44c7a9398cd2b665032a8374e5f8  | ITS1 | 10297 | ITS5/ITS4                         | -111.5680° | 35.5722°  | Soil                      | 21   | 4936    | 4.2544  | Desert    | 8.5  | 284  | 7.9  | China          | <i>Bouteloua eriopoda</i>   |
|                       | 9518f772616f9fb7d686094bd0420d85  | ITS1 | 6561  | ITS5/ITS4                         | -111.5680° | 35.5722°  | Soil                      | 22   | 6896    | 3.1902  | Desert    | 8.5  | 284  | 7.9  | China          | <i>Bouteloua eriopoda</i>   |

*Malbranchea ostraviensis*

|                                  |      |       |                                      |            |           |                     |     |         |        |           |      |       |      |                  |                                  |
|----------------------------------|------|-------|--------------------------------------|------------|-----------|---------------------|-----|---------|--------|-----------|------|-------|------|------------------|----------------------------------|
| b4bf4d87fc6b59967e36d9c32b25dbaf | ITS1 | 10297 | ITS5/ITS4                            | -111.5680° | 35.5722°  | Soil                | 21  | 4936    | 4.2544 | Desert    | 8.5  | 284   | 7.9  | China            | <i>Bouteloua eriopoda</i>        |
| bf10747fd122c6df4de25f2932d86a68 | ITS1 | 20253 | ITS5/ITS4                            | -111.5680° | 35.5722°  | Soil                | 5   | 7741    | 0.6459 | Desert    | 8.5  | 284   | 7.9  | China            | <i>Bouteloua eriopoda</i>        |
| 807de4363a2bebd5bfabd3e31975c663 | ITS2 | 18036 | flITS7/ITS4                          | -112.0220° | 37.5073°  | Soil                | 16  | 99759   | 0.1603 | Shrubland | 11.6 | 208   | 8.27 | Australia        | NA                               |
| d59acf27406f4525d1f58425507d2d66 | ITS2 | 38925 | ITS4_Fun/5.8S_Fun                    | -111.5680° | 35.5722°  | Soil                | 12  | 23196   | 0.5173 | Desert    | 12.3 | 284   | NA   | USA              | NA                               |
| f6bb539ca3a49cd8fed8176d08e6dbeb | ITS2 | 8521  | ITS1F/ITS4                           | 148.7990°  | -35.4214° | Soil                | 1   | 247458  | 0.0040 | Forest    | 9.2  | 12.21 | 5.7  | Australia        | NA                               |
| 0b29b8b0a58e5f449d04d2e1095151b8 | ITS2 | 11368 | ITS1F/ITS4                           | 116.1210°  | -32.5668° | Soil                | 1   | 85183   | 0.0117 | Forest    | 16.6 | 111   | 5.7  | Australia        | NA                               |
| 224e02ea3652ecdd154ed6b69e47fad2 | ITS2 | 38925 | ITS4_Fun/5.8S_Fun                    | -111.5680° | 35.5722°  | Soil                | 12  | 23196   | 0.5173 | Desert    | 12.3 | 284   | NA   | USA              | NA                               |
| 24c9b467a52bc6f686c125282369efb3 | ITS2 | 38925 | ITS4_Fun/5.8S_Fun                    | -111.5680° | 35.5722°  | Soil                | 12  | 23196   | 0.5173 | Desert    | 12.3 | 284   | NA   | USA              | NA                               |
| 891f4e1ac4b2d6817e2413b6378e9af3 | ITS2 | 7687  | ITS1F/ITS4                           | 132.2240°  | -30.9014° | Soil                | 1   | 99489   | 0.0100 | Shrubland | 18   | 251   | 9.4  | Australia        | NA                               |
| 9a366b4cbcbdb40340dae6d493b76461 | ITS2 | 1161  | ITS1F/ITS4                           | 132.1980°  | -30.8871° | Soil                | 1   | 89984   | 0.0111 | Desert    | 18.2 | 229   | 9    | Australia        | NA                               |
| bf043a995eda08cc3ce7257ddab9b2cd | ITS2 | 18036 | flITS7/ITS4                          | -112.0220° | 37.5073°  | Soil                | 16  | 99759   | 0.1603 | Shrubland | 11.6 | 208   | 8.27 | USA              | NA                               |
| ca068179681c4fbf6448a9392101a2b9 | ITS2 | 11205 | ITS1F/ITS4                           | -145.0290° | -36.6732° | Soil                | 25  | 255464  | 0.0978 | Woodland  | 15.1 | 530   | 5.5  | Chile            | <i>Cistanthe longiscapa</i>      |
| da95aec3cba7c9d7defe2155f2708d1b | ITS1 | 266   | ITS1F/ITS4                           | 140.6960°  | -34.0597° | Soil                | 744 | 1816901 | 0.4094 | Shrubland | 17.6 | 246   | 9    | Australia        | NA                               |
| e2331d285395d127637a255e5313362d | ITS1 | 30533 | ITS1F/ITS4                           | -0.21350°  | 38.8145°  | Soil                | 6   | 16411   | 0.3656 | Shrubland | 14.5 | 700   | 7    | Spain            | <i>Fagaceae</i>                  |
| fab7073bcf7bcb14c24b05f37dbcc8cb | ITS1 | 38755 | ITS5/ITS2                            | 107.5000°  | 35.6700°  | Soil                | 193 | 29661   | 6.5068 | Grassland | 10.9 | 403   | NA   | China            | <i>Artemisia vestita</i>         |
| 8efc0fe7a2ffe243803e6250e59e37c6 | ITS1 | 7727  | ITS1F/ITS4                           | 138.1300°  | -35.6407° | Soil                | 37  | 107794  | 0.3432 | Woodland  | 15.3 | 673   | 8.3  | Australia        | NA                               |
| 88a7a5c5b7c4748852045d00b1f4b704 | ITS1 | 24340 | ITS1F/ITS2                           | 115.4290°  | 39.9613°  | Soil                | 34  | 76690   | 0.4433 | Forest    | 5.8  | 549   | 6.81 | China            | <i>Acer truncatum</i>            |
| f7de87dcf3f04a2947c052c37a90e8b2 | ITS1 | 704   | ITS5/ITS2                            | 88.0600°   | 44.4100°  | Soil                | 61  | 65664   | 0.9289 | Desert    | 9.5  | 150   | 7.81 | China            | <i>Seriphidium transiliense</i>  |
| 65c316ed491497d38738aee4e63d0122 | ITS1 | 266   | ITS1F/ITS4                           | 140.6960°  | -34.0597° | Soil                | 744 | 1816901 | 0.4094 | Shrubland | 17.6 | 246   | 9    | Australia        | NA                               |
| c5b135116f3e42662adfbe278d6bb704 | ITS1 | 266   | ITS1F/ITS4                           | 140.6960°  | -34.0597° | Soil                | 744 | 1816901 | 0.4094 | Shrubland | 17.6 | 246   | 9    | Australia        | NA                               |
| 49de2234c95ff76b2686a566cbacb7ac | ITS1 | 2755  | ITS1F/ITS4                           | 126.9830°  | -31.8633° | Soil                | 749 | 154275  | 4.8549 | Shrubland | 17.9 | 272   | 8.6  | Australia        | NA                               |
| e49f9e99a02467d8add8a8dd5d39de0d | ITS1 | 38755 | ITS5/ITS2                            | 107.5000°  | 35.6700°  | Soil                | 193 | 29661   | 6.5068 | Grassland | 10.9 | 403   | NA   | China            | <i>Artemisia vestita</i>         |
| 756bbeb0cc007f63c2d532ed2e0b50ff | ITS2 | 3771  | ITS3ngs1 to 5 +<br>ITS3ngs10/ITS4ngs | -5.6785°   | -15.9489° | Soil                | 4   | 31158   | 0.1283 | Woodland  | 18.8 | 892   | 5.75 | Saint Helena, UK | <i>Commidendrum robustum</i>     |
| 6a9cdac94c3c574f6eed3f8b710225fe | ITS2 | 6651  | ITS86F/ITS4                          | -3.3548°   | 36.9241°  | Soil                | 124 | 168805  | 0.7345 | Shrubland | 13.7 | 498   | 7.24 | Spain            | <i>Thymus zygis</i>              |
| 4d2b1c5da794d1f3dedd25641141889a | ITS2 | 1019  | flITS7/ITS4                          | -64.9345°  | -23.9188° | Soil                | 478 | 235226  | 2.0320 | Forest    | 19.8 | 739   | 6.76 | Argentina        | <i>Calycophy sp.</i>             |
| 3629c91686004069fe1bb36c2eec7da8 | ITS2 | 1019  | flITS7/ITS4                          | -64.9345°  | -23.9188° | Soil                | 478 | 235226  | 2.0320 | Forest    | 19.8 | 739   | 6.76 | Argentina        | <i>Calycophy sp.</i>             |
| 29ecb1dc973d7d84d0c4c4d5abf8d4f0 | ITS2 | 2065  | flITS7/ITS4                          | -64.8503°  | -23.7571° | Soil                | 249 | 139337  | 1.7870 | Forest    | 20.2 | 752   | 6.85 | Argentina        | <i>Calycophyllum multiflorum</i> |
| 0a4574962adb57149453ccd4018f5d94 | ITS2 | 3773  | ITS3/ITS4                            | -5.6785°   | -15.9489° | Soil                | 2   | 287758  | 0.0069 | Forest    | 18.8 | 892   | 5.75 | Saint Helena, UK | NA                               |
| 0553eeb1a85066ed6bde7c96c5732c1f | ITS2 | 6186  | ITS1F/ITS4                           | 9.4890°    | 39.8060°  | Soil                | 1   | 207333  | 0.0048 | Cropland  | 15.5 | 632   | 8.1  | Ethiopia         | NA                               |
| d0961116d67b4b46b52ff86b091db60a | ITS2 | 1019  | flITS7/ITS4                          | -64.9345°  | -23.9188° | Soil                | 478 | 235226  | 2.0320 | Forest    | 19.8 | 739   | 6.76 | Argentina        | <i>Calycophy sp.</i>             |
| 1895b6c87131814ff4bcad198008cadb | ITS2 | 6186  | ITS1F/ITS4                           | 9.4890°    | 39.8060°  | Soil                | 1   | 207333  | 0.0048 | Cropland  | 15.5 | 632   | 8.1  | Ethiopia         | NA                               |
| fce2849c9bd9bc6bb1883c0cea5e1f5f | ITS2 | 7529  | ITS1F/ITS4                           | 143.9730°  | -39.6509° | Soil                | 104 | 304789  | 0.3412 | Woodland  | 13.6 | 898   | 6.3  | Australia        | NA                               |
| 5d3e2f00b11b8a7d548a666aab7f94ae | ITS1 | 30015 | ITS5/ITS4                            | -2.3773°   | 42.5406°  | Rhizosphere<br>soil | 9   | 98405   | 0.0914 | Cropland  | 13   | 626   | 8.2  | Spain            | <i>Vitis vinifera</i>            |
| ae0dae2a04eb077edae2edca26f4e64  | ITS1 | 7295  | ITS5/ITS4                            | -2.77837°  | 42.5060°  | Root                | 36  | 137225  | 0.2623 | Cropland  | 12.9 | 735   | 8.2  | Spain            | <i>Vitis vinifera</i>            |
| fc51339587df9c6b0c0e96cftb3f7134 | ITS1 | 25274 | ITS5/ITS4                            | -2.7783°   | 42.5060°  | Soil                | 1   | 99656   | 0.0100 | Cropland  | 12.9 | 735   | 8.2  | Spain            | <i>Vitis vinifera</i>            |
| 36582ea8149842112f925cf5bd4fb7bf | ITS1 | 29875 | ITS5/ITS4                            | -0.6056°   | 39.8002°  | Soil                | 2   | 13115   | 0.1524 | Shrubland | 13.7 | 451   | 8.2  | Spain            | <i>Fagaceae</i>                  |

*Malbranchea reticulata*

|                                    |                                   |      |       |                                          |           |           |                  |      |        |         |                  |      |     |      |                |                               |
|------------------------------------|-----------------------------------|------|-------|------------------------------------------|-----------|-----------|------------------|------|--------|---------|------------------|------|-----|------|----------------|-------------------------------|
| <i>Malbranchea sinuata</i>         | 2de5f5c7fe5cdd8f6709262f7259c64e  | ITS1 | 29212 | ITS5/ITS4                                | 106.3910° | 36.2850°  | Soil             | 220  | 82126  | 2.6788  | Grassland        | 6.2  | 472 | 8.4  | China          | <i>Potentilla bifurca</i>     |
|                                    | fea93efbc361fd6342f8ab629b340788  | ITS1 | 30015 | ITS5/ITS4                                | -2.7738°  | 42.5406°  | Rhizosphere soil | 9    | 98405  | 0.0914  | Rhizosphere soil | 13   | 626 | 8.2  | Spain          | <i>Vitis vinifera</i>         |
|                                    | d20fec209db7ea37996ed7797d6e30e8  | ITS1 | 7295  | ITS5/ITS4                                | -2.7783°  | 42.5060°  | Root             | 36   | 137225 | 0.2623  | Cropland         | 12.9 | 735 | 8.2  | Spain          | <i>Vitis vinifera</i>         |
|                                    | b97a6a1d8852297bcc309fd116cbdbd1  | ITS1 | 27425 | ITS5/ITS4                                | -2.8695°  | 42.5860°  | Rhizosphere soil | 85   | 116060 | 0.7323  | Cropland         | 13   | 601 | 8.1  | Spain          | <i>Vitis vinifera</i>         |
|                                    | 01bdacc124d1ede25d8196d035066359  | ITS1 | 30015 | ITS5/ITS4                                | -2.7738°  | 42.5406°  | Soil             | 9    | 98405  | 0.0914  | Cropland         | 13   | 626 | 8.2  | Spain          | <i>Vitis vinifera</i>         |
|                                    | 68e518b58c32fdd9979a00a069cec2a0  | ITS1 | 23595 | ITS5/ITS4                                | -2.7738°  | 42.5406°  | Soil             | 9    | 98405  | 0.0914  | Cropland         | 13   | 626 | 8.2  | Spain          | <i>Vitis vinifera</i>         |
|                                    | 14fed96baab05ea2c0fcd2b98e90504e  | ITS2 | 2332  | flITS7/ITS4                              | -0.5990°  | 39.8100°  | Soil             | 8    | 59966  | 0.1334  | Shrubland        | 13.7 | 498 | 7.24 | Spain          | NA                            |
|                                    | 359dd2964540ffdb3b3b3f32a12cb16fj | ITS2 | 2332  | flITS7/ITS4                              | -0.5990°  | 39.8100°  | Soil             | 8    | 59966  | 0.1334  | Shrubland        | 13.7 | 498 | 7.24 | Spain          | NA                            |
|                                    | 48b0121f63efd52b66d2304b7cb45a68  | ITS2 | 10269 | ITS86F/ITS4                              | -0.5990°  | 39.8100°  | Rhizosphere soil | 1613 | 152304 | 10.5906 | Shrubland        | 13.7 | 498 | 7.24 | Spain          | NA                            |
|                                    | 4f177c8e38014e0cd15d605d47bc791c  | ITS2 | 17695 | ITS86F/ITS4                              | -0.5990°  | 39.8100°  | Rhizosphere soil | 30   | 46082  | 0.6510  | Shrubland        | 13.7 | 498 | 7.24 | Spain          | NA                            |
|                                    | 5853d823431a49fbd9f7b1e14f831aa9  | ITS2 | 15421 | flITS7/ITS4                              | -0.5990°  | 39.8100°  | Soil             | 1    | 83418  | 0.0119  | Shrubland        | 13.7 | 498 | 7.24 | Spain          | NA                            |
|                                    | 97c18eeb8268a6e478d65917fe22c99d  | ITS2 | 10269 | ITS86F/ITS4                              | -0.5990°  | 39.8100°  | Rhizosphere soil | 1613 | 152304 | 10.5906 | Shrubland        | 13.7 | 498 | 7.24 | Spain          | NA                            |
|                                    | cb7fbfa4ba2ef68f259de7695dd758c5  | ITS2 | 4008  | ITS86F/ITS4                              | -0.5990°  | 39.8100°  | Rhizosphere soil | 13   | 175789 | 0.0739  | Shrubland        | 13.7 | 498 | 7.24 | Spain          | NA                            |
|                                    | d1ba8f189fd7633e53a4d8cb109edcf1  | ITS2 | 7940  | ITS86F/ITS4                              | -0.5990°  | 39.8100°  | Rhizosphere soil | 4    | 180300 | 0.0221  | Shrubland        | 13.7 | 498 | 7.24 | Spain          | NA                            |
|                                    | ec0c41ce1a81fc8e77dd3837ab5b4c5e  | ITS2 | 7940  | ITS86F/ITS4                              | -0.5990°  | 39.8100°  | Rhizosphere soil | 4    | 180300 | 0.0221  | Shrubland        | 13.7 | 498 | 7.24 | Spain          | NA                            |
| <i>Malbranchea umbrina</i>         | f5b27a0dbb46b18d33735c0e873a9e26  | ITS2 | 4008  | ITS86F/ITS4                              | -0.5990°  | 39.8100°  | Rhizosphere soil | 13   | 175789 | 0.0739  | Shrubland        | 13.7 | 498 | 7.24 | Spain          | NA                            |
|                                    | 48cfa647b43d6eae02300620628ca72   | ITS1 | 3660  | ITS1F/ITS4                               | 143.9780° | -39.6652° | Soil             | 5223 | 168024 | 31.0848 | Grassland        | 13.6 | 902 | 6    | Australia      | NA                            |
|                                    | 63c5681915266e6894bc6c8c67052a03  | ITS1 | 3375  | ITS1F/ITS4                               | 147.2060° | -42.5591° | Soil             | 394  | 183462 | 2.1475  | Grassland        | 11   | 621 | 6.3  | Australia      | NA                            |
|                                    | 268a87412a6732d93ec3895f89f13601  | ITS1 | 3660  | ITS1F/ITS4                               | 143.9780° | -39.6652° | Soil             | 5223 | 168024 | 31.0848 | Grassland        | 13.6 | 902 | 6    | Australia      | NA                            |
|                                    | 05e868cda13b07e391e67670a28c8154  | ITS1 | 3660  | ITS1F/ITS4                               | 143.9780° | -39.6652° | Soil             | 5223 | 168024 | 31.0848 | Grassland        | 13.6 | 902 | 6    | Australia      | NA                            |
|                                    | aa0058509589bdec8803d7807f8b0694  | ITS1 | 30507 | ITS1ngs/ITS4ngs                          | 23.0754°  | 58.5970°  | Soil             | 1    | 3067   | 0.3260  | Grassland        | 6.7  | 598 | NA   | Estonia        | <i>Platanthera chlorantha</i> |
|                                    | 1bc6a3e669e2a15c2e04d0612ca1d668  | ITS1 | 3375  | ITS1F/ITS4                               | 147.2060° | -42.5591° | Soil             | 394  | 183462 | 2.1475  | Grassland        | 11   | 621 | 6.3  | Australia      | NA                            |
|                                    | 1c6e10293ec4f4db86091c8262460fa7  | ITS1 | 88274 | ITS9MUNngs/ITS4ngsUni                    | 14.2031°  | 50.5590°  | Soil             | 15   | 14241  | 1.0532  | Forest           | 9    | 520 | NA   | Czech Republic | NA                            |
|                                    | 2c1121416373432b5dc8eb1c5ee60074  | ITS1 | 3660  | ITS1F/ITS4                               | 143.9780° | -39.6652° | Soil             | 5223 | 168024 | 31.0848 | Grassland        | 13.6 | 902 | 6    | Australia      | NA                            |
|                                    | 66258fde92ed296945e28d055369d979  | ITS1 | 153   | ITS1F/ITS4                               | 143.9730° | -39.6509° | Soil             | 3962 | 229833 | 17.2386 | Grassland        | 13.6 | 898 | 6.3  | Australia      | NA                            |
|                                    | a5d82710dd8f13a6a93f301d13d9f33b  | ITS1 | 6360  | ITS1F/ITS4                               | 143.9780° | -39.6652° | Soil             | 5223 | 168024 | 31.0848 | Grassland        | 13.6 | 902 | 6    | Australia      | NA                            |
|                                    | 55a9b72ff6876945ceafbdbf4fcef81   | ITS2 | 32534 | flITS9/ITS4                              | 23.2006°  | 41.6661°  | Soil             | 3    | 5378   | 0.5578  | Grassland        | 14   | 471 | 7.62 | Grece          | <i>Tragopogon dubius</i>      |
|                                    | 0bbc76d8305028322152d0f89d594ea0  | ITS2 | 2750  | ITS3-Mix1 to 2/ITS4-cwmix1 + ITS4-cwmix2 | 11.9304°  | 57.6214°  | Soil             | 1    | 210391 | 0.0047  | Grassland        | 8    | 801 | 6.13 | Sweden         | <i>Anthriscus sylvestris</i>  |
|                                    | c681c34747874919975586c6e40c0843  | ITS2 | 12821 | flITS7/ITS4                              | 143.9730° | -39.6509° | Soil             | 1    | 69976  | 0.0142  | Forest           | 13.6 | 898 | 6.3  | Australia      | NA                            |
| <i>Myriodontium keratinophilum</i> | a65b4142d6e9b6c348f33ce73f7282f4  | ITS2 | 8993  | ITS9MUNngs/ITS4ngsUni                    | 14.1742°  | 49.5002°  | Soil             | 3    | 7710   | 0.3891  | Forest           | 8.5  | 513 | NA   | Czech Republic | NA                            |
|                                    | 37cbcadce36c48343a7230eb7344f106  | ITS2 | 13814 | ITS9MUNngs/ITS4ngsUni                    | 14.1742°  | 49.5002°  | Soil             | 6    | 21584  | 0.2779  | Forest           | 8.5  | 513 | NA   | Czech Republic | NA                            |
|                                    | 6f8eb23c8585c4777bb61a30a308dc0f  | ITS2 | 13814 | ITS9MUNngs/ITS4ngsUni                    | 14.1742°  | 49.5002°  | Soil             | 6    | 21584  | 0.2779  | Forest           | 8.5  | 513 | NA   | Czech Republic | NA                            |
|                                    | b632cc842e33fe1191ca5be218bf55cd  | ITS1 | 6989  | ITS3_KYO02/ITS4                          | -2.8696°  | 42.5867°  | Root             | 61   | 109759 | 0.5557  | Cropland         | 13   | 601 | 8.1  | Spain          | <i>Vitis vinifera</i>         |
|                                    | 8112b4833379faaf92bfc523fd634d84  | ITS1 | 9584  | ITS3_KYO02/ITS4                          | -2.8528°  | 42.5928°  | Rhizosphere soil | 17   | 111334 | 0.1526  | Cropland         | 13   | 598 | 8.2  | Spain          | <i>Vitis vinifera</i>         |
|                                    | 013598c790b9b858a456176155b7ecd0  | ITS1 | 6989  | ITS3_KYO02/ITS4                          | -2.8695°  | 42.5867°  | Root             | 61   | 109759 | 0.5557  | Cropland         | 13   | 601 | 8.1  | Spain          | <i>Vitis vinifera</i>         |
|                                    | 2a4b62c85b066477efec737e2a80304a  | ITS1 | 261   | ITS1F/ITS4                               | 138.1210° | -35.6364° | Soil             | 99   | 246488 | 0.4016  | Woodland         | 15.5 | 632 | 8.5  | Australia      | NA                            |



***Neorhizopsis hispanica***

|                                   |      |       |                       |           |           |                  |     |        |        |           |      |      |      |             |                                 |
|-----------------------------------|------|-------|-----------------------|-----------|-----------|------------------|-----|--------|--------|-----------|------|------|------|-------------|---------------------------------|
| 5364e263a98c9b64def91949f6ef3549  | ITS1 | 90126 | ITS1F/ITS4            | 138.1210° | -35.6348° | Soil             | 28  | 151241 | 0.1851 | Woodland  | 15.5 | 632  | 8.2  | Australia   | NA                              |
| e69a59d6a36bc41d9ed65ab7d5b8851a  | ITS1 | 3558  | ITS1F/ITS4            | 138.6920° | -34.7735° | Soil             | 50  | 136733 | 0.3656 | Woodland  | 15.4 | 614  | 7.83 | Australia   | NA                              |
| 6fdb33be67c78cea1e5fd0aff792733   | ITS1 | 996   | ITS1F/ITS4            | 138.1260° | -35.6382° | Soil             | 3   | 237916 | 0.0126 | Woodland  | 15.3 | 673  | 5.9  | Australia   | NA                              |
| 9c6cd8c46298f0af734c3efc617fb93a  | ITS1 | 261   | ITS1F/ITS4            | 138.1210° | -35.6364° | Soil             | 99  | 246488 | 0.4016 | Woodland  | 15.5 | 632  | 8.5  | Australia   | NA                              |
| 842f6acf69311d0952307039e7633ec0  | ITS1 | 261   | ITS1F/ITS4            | 138.1210° | -35.6364° | Soil             | 99  | 246488 | 0.4016 | Woodland  | 15.5 | 632  | 8.5  | Australia   | NA                              |
| fc13b6d20bbe7a8352a5363b2b963364  | ITS1 | 12850 | ITS5/ITS2             | 116.4800° | 39.8800°  | Air              | 1   | 52993  | 0.0188 | Urban     | 12.6 | 609  | NA   | China       | NA                              |
| ac48708b22c62cea2d0b84f6c16f3cfd  | ITS2 | 383   | ITS1F/ITS4            | 147.3880° | -33.8449° | Soil             | 284 | 36251  | 7.8342 | Urban     | NA   | NA   | NA   | Australia   | NA                              |
| b6b27131119016b221d45fd91a985313  | ITS2 | 14295 | ITS86F/ITS4           | 147.3880° | -33.8449° | Soil             | 78  | 142819 | 0.5461 | Woodland  | NA   | NA   | NA   | Australia   | NA                              |
| 8334fb694d4569002e570ce461d8fdb1  | ITS2 | 7529  | ITS1F/ITS4            | 147.3880° | -33.8449° | Soil             | 4   | 161891 | 0.0247 | Woodland  | NA   | NA   | NA   | Australia   | NA                              |
| 75d4348ddf11e3426da76513adf65655  | ITS2 | 383   | ITS1F/ITS4            | 147.3880° | -33.8449° | Soil             | 284 | 36251  | 7.8342 | Urban     | NA   | NA   | NA   | Australia   | NA                              |
| 6eea9c9203e740c9a55fe52890a04d6c  | ITS2 | 20796 | ITS1F/ITS4            | 147.3880° | -33.8449° | Soil             | 5   | 52598  | 0.0950 | Urban     | NA   | NA   | NA   | Australia   | NA                              |
| 246be542e5056e2ee90da0cca2c2811b  | ITS2 | 7529  | ITS1F/ITS4            | 147.3880° | -33.8449° | Soil             | 4   | 161891 | 0.0247 | Woodland  | NA   | NA   | NA   | Australia   | NA                              |
| 1693fa65e00d3561d6c5c74ba2eff2b5  | ITS2 | 383   | ITS1F/ITS4            | 147.3880° | -33.8449° | Soil             | 284 | 36251  | 7.8342 | Urban     | NA   | NA   | NA   | Australia   | NA                              |
| 7bc0310bc55364cb5e40774a87265b3f  | ITS2 | 3486  | ITS86F/ITS4           | -2.85282° | 42.5928°  | Rhizosphere soil | 78  | 142819 | 0.5461 | Shrubland | NA   | NA   | NA   | Spain       | NA                              |
| 7bc0310bc55364cb5e40774a87265b3fj | ITS2 | 383   | ITS1F/ITS4            | 147.3880° | -33.8449° | Soil             | 284 | 36251  | 7.8342 | Urban     | NA   | NA   | NA   | Australia   | NA                              |
| ce0448ca2d562aee1cec131f0f2e7708  | ITS2 | 3486  | ITS86F/ITS4           | -2.8528°  | 42.5928°  | Rhizosphere soil | 78  | 142819 | 0.5461 | Shrubland | NA   | NA   | NA   | Spain       | NA                              |
| 4cc4104c05180c30c5d8002ad2cd05d5  | ITS1 | 3066  | ITS1F/ITS2            | 143.1440° | -37.3155° | Soil             | 350 | 67725  | 5.1679 | Cropland  | 12.9 | 547  | 6.7  | Australia   | <i>Vitis vinifera</i>           |
| 65bf880175c024cf31d6dcd69e66e8e5  | ITS1 | 35783 | ITS5/ITS2             | 106.5700° | 26.6600°  | Soil             | 3   | 78503  | 0.0382 | Cropland  | 15.1 | 9.21 | 7.32 | China       | <i>Zea mays</i>                 |
| 40cf2e717653ab7099923e7250254e1c  | ITS1 | 35783 | ITS5/ITS2             | 106.5700° | 26.6600°  | Soil             | 3   | 78503  | 0.0382 | Cropland  | 15.1 | 9.21 | 7.32 | China       | <i>Zea mays</i>                 |
| edd1864aeecfeec794949907032a4054  | ITS1 | 19084 | ITS5/ITS2             | 106.5700° | 26.6600°  | Soil             | 325 | 57018  | 5.6999 | Forest    | NA   | NA   | NA   | China       | NA                              |
| 1fec869b64ba2f1a2c553af845dc382a  | ITS1 | 6176  | ITS1F/ITS4            | 105.5570° | -10.4788° | Soil             | 16  | 185285 | 0.0863 | Forest    | 26.4 | 1772 | 7    | Australia   | NA                              |
| 01aea6da4950e4538494b1d7888f8baf  | ITS1 | 6176  | ITS1F/ITS4            | 105.5570° | -10.4788° | Soil             | 16  | 185285 | 0.0863 | Forest    | 26.4 | 1772 | 7    | Australia   | NA                              |
| 942c0d9132e722d33218633189c7510f  | ITS1 | 31064 | ITS5/ITS2             | 116.4800° | 39.8800°  | Air              | 1   | 53138  | 0.0188 | Urban     | 12.6 | 609  | NA   | China       | NA                              |
| 69c8d0fbaadb1261a386813f9acd0da7  | ITS1 | 3101  | ITS1F/ITS4            | 126.9550° | 37.4653°  | Air              | 4   | 71226  | 0.0561 | Urban     | 12   | 1383 | NA   | South Korea | NA                              |
| be5b8960de60a541376e2fdd2eb4c371  | ITS1 | 6176  | ITS1F/ITS4            | 105.5570° | -10.4788° | Soil             | 16  | 185285 | 0.0863 | Forest    | 26.4 | 1772 | 7    | Australia   | NA                              |
| a33435a4c1e6f39dfa7f405b75632e08  | ITS1 | 34826 | ITS9MUNngs/ITS4ngsUni | 26.6224°  | 59.4217°  | Soil             | 2   | 8525   | 0.2346 | Urban     | 6    | 599  | NA   | Estonia     | NA                              |
| aad89f84073c6ebcd8bd13891b38fe0d  | ITS2 | 5691  | fITS7/ITS4            | 114.6500° | 22.5700°  | Root             | 212 | 42341  | 5.0069 | Shrubland | 23.2 | 1929 | NA   | China       | <i>Mussaenda kwangtungensis</i> |
| c1b37851a02fddf789a908294e4eb5cd  | ITS2 | 19349 | fITS7/ITS4            | 114.6500° | 22.5700°  | Rhizosphere soil | 133 | 62195  | 2.1384 | Shrubland | 23.2 | 1929 | NA   | China       | <i>Mussaenda kwangtungensis</i> |
| a69ab1f930a9fa38690a88a6640e687a  | ITS2 | 17538 | glITS7/ITS4           | 108.7830° | 18.7000°  | Soil             | 85  | 37901  | 2.2426 | Forest    | 24.7 | 1196 | 6.7  | China       | <i>Castanopsis carlesii</i>     |
| 9a96ecd907c063cb6be4b0f22dc996d3  | ITS2 | 1401  | ITS3_KYO2/ITS4        | 113.7760° | 35.1278°  | Rhizosphere soil | 17  | 3516   | 4.8350 | Cropland  | 15   | 586  | 7.15 | China       | <i>Malus robusta Rehd</i>       |
| 5de791713be1cefce6da52897bba5f53  | ITS2 | 19349 | fITS7/ITS4            | 114.6500° | 22.5700°  | Rhizosphere soil | 133 | 62195  | 2.1384 | Shrubland | 23.2 | 1929 | NA   | China       | <i>Mussaenda kwangtungensis</i> |
| 43781e469b92027c20542855f1d5da91  | ITS2 | 24367 | ITS3_KYO2/ITS4        | 113.7660° | 35.1278°  | Rhizosphere soil | 61  | 37248  | 1.6376 | Cropland  | 15   | 586  | 7    | China       | <i>Punica granatum</i>          |
| 3ef9835296ea904553cffed4f958643c  | ITS2 | 3313  | ITS1F/ITS4            | 138.1160° | -35.6327° | Soil             | 52  | 157047 | 0.3311 | Woodland  | 15.5 | 639  | 6    | Australia   | NA                              |
| e907ac06a7292f99155d2442c8ffb927  | ITS2 | 22622 | ITS3_KYO2/ITS4        | 113.7660° | 35.1278°  | Rhizosphere soil | 101 | 47605  | 2.1216 | Cropland  | 15   | 586  | 7    | China       | NA                              |
| cecc282b6306dd698c13cb02042a8fe2  | ITS2 | 26147 | fITS7/ITS4            | 112.3330° | 16.8333°  | Soil             | 23  | 28782  | 0.7991 | Woodland  | 26.8 | 1504 | 8.71 | China       | NA                              |
| fd477cc21b5237f552a04492512cb152  | ITS2 | 16692 | ITS9/ITS4             | 132.9160° | 34.2978°  | Sediment         | 276 | 51771  | 5.3311 | Aquatic   | 16.9 | 1288 | NA   | Japan       | NA                              |

|                                     |                                   |      |       |                       |            |           |                  |      |        |         |           |      |      |      |           |                         |
|-------------------------------------|-----------------------------------|------|-------|-----------------------|------------|-----------|------------------|------|--------|---------|-----------|------|------|------|-----------|-------------------------|
| <i>Neorhizopsis sexualis</i>        | 8185dcee25c105bfb0b2f0e3662264a4  | ITS1 | 34428 | ITS5/ITS2             | 26.6224°   | 59.4217°  | Soil             | 9    | 34480  | 0.2610  | Grassland | NA   | NA   | NA   | Estonia   | NA                      |
|                                     | 7255587fd47511e70b2d96f92082a771  | ITS1 | 2055  | ITS1F/ITS4            | 138.1210°  | -35.6364° | Soil             | 1    | 24648  | 0.0405  | Grassland | 15.5 | 632  | 8.5  | Australia | NA                      |
|                                     | 68b299cb1d77766e47660959035767db  | ITS1 | 40897 | ITS5/ITS2             | 26.6224°   | 59.4217°  | Soil             | 9    | 34480  | 0.2610  | Grassland | NA   | NA   | NA   | Estonia   | NA                      |
|                                     | 7fb168f5a0f149dae418bdcaf2d543fa  | ITS2 | 8283  | glITS7ngs/ITS4ngsUni  | -111.5680° | 35.5722°  | Soil             | 1    | 282837 | 0.0035  | Forest    | NA   | NA   | NA   | USA       | NA                      |
|                                     | ac3b461583e8ee39d91cdf9ca19d9797  | ITS2 | 1430  | glITS7ngs/ITS4ngsUni  | -111.5680° | 35.5722°  | Soil             | 1    | 314307 | 0.0031  | Forest    | NA   | NA   | NA   | USA       | NA                      |
|                                     | 4b8caf103c5d55836a7944a55fa398b7  | ITS2 | 5388  | glITS7ngs/ITS4ngsUni  | -111.5680° | 35.5722°  | Soil             | 5    | 153897 | 0.0324  | Forest    | NA   | NA   | NA   | USA       | NA                      |
|                                     | 7b0dad2499764e751c26de620e73a14f  | ITS2 | 16552 | glITS7ngs/ITS4ngsUni  | -111.5680° | 35.5722°  | Soil             | 3    | 234630 | 0.0127  | Forest    | NA   | NA   | NA   | USA       | NA                      |
|                                     | 2589891256c1a648275483f8a49d5321  | ITS2 | 24795 | glITS7ngs/ITS4ngsUni  | -111.5680° | 35.5722°  | Soil             | 1    | 391156 | 0.0025  | Forest    | NA   | NA   | NA   | USA       | NA                      |
|                                     | 2060fd663829fddbaaca1f510491775e  | ITS2 | 16552 | glITS7ngs/ITS4ngsUni  | -111.5680° | 35.5722°  | Soil             | 3    | 234630 | 0.0127  | Forest    | NA   | NA   | NA   | USA       | NA                      |
| <i>Pseudoamaurascopsis spiralis</i> | 9bfe26c65f8ca1bdb11becfa49157398  | ITS2 | 16552 | glITS7ngs/ITS4ngsUni  | -111.5680° | 35.5722°  | Soil             | 3    | 234630 | 0.0127  | Forest    | NA   | NA   | NA   | USA       | NA                      |
|                                     | b00bda826c9f9b2dcb557f576caf2f3b  | ITS1 | 26312 | ITS1F/58A2R           | 9.81922°   | 56.5354°  | Soil             | 4    | 5596   | 0.7147  | Cropland  | 8.3  | 618  | 5.9  | Denmark   | <i>Secale</i> sp.       |
|                                     | ba41b4f3b3a33c3daf3c52fc0023b25e  | ITS1 | 18948 | ITS1F/58A2R           | 9.81922°   | 56.5354°  | Soil             | 11   | 1899   | 5.7925  | Cropland  | 8.3  | 618  | 5.9  | Denmark   | <i>Secale</i> sp.       |
|                                     | 7857d46e6e384677180caf3073f29816  | ITS1 | 33069 | ITS1/ITS4             | 125.2170°  | 49.1167°  | Soil             | 52   | 18796  | 2.7665  | Cropland  | 1.7  | 493  | 5.32 | China     | <i>Glycine</i> sp.      |
|                                     | 4f32c6dfc49fb20737038fb484752e    | ITS1 | 6783  | ITS5/5.8S_fungi       | -5.27019°  | 51.7000°  | Soil             | 37   | 524903 | 0.0704  | Grassland | 11   | 997  | 5.2  | UK        | NA                      |
|                                     | 3ec399c5f82f86e41d7e1da82503ed57  | ITS1 | 31840 | ITS1/ITS4             | 126.1330°  | 48.8667°  | Soil             | 11   | 14022  | 0.7844  | Cropland  | 1.2  | 523  | 5.39 | China     | <i>Glycine</i> sp.      |
|                                     | 884d3adc4ec14e1018e7b65eb6dbcd4d  | ITS1 | 11441 | ITS5/5.8S_fungi       | -3.1097°   | 52.6375°  | Soil             | 5722 | 227200 | 25.1848 | Grassland | 9.1  | 1218 | 5.2  | UK        | NA                      |
|                                     | 4be2c89cb967bb9cdfd6bcbfde9a19548 | ITS1 | 14940 | ITS3_KYO2/ITS4        | -2.7738°   | 42.5406°  | Root             | 857  | 153279 | 5.5911  | Cropland  | 13   | 626  | 8.2  | Spain     | <i>Vitis vinifera</i>   |
|                                     | 5f0a38522aef314efb5cd66ee746b313  | ITS1 | 11441 | ITS5/5.8S_fungi       | -3.1097°   | 52.6375°  | Root             | 5722 | 227200 | 25.1848 | Grassland | 9.1  | 1218 | 5.2  | UK        | NA                      |
|                                     | 80c894e5fddd940df70aea933a4098bc  | ITS1 | 9584  | ITS3_KYO2/ITS4        | -2.8528°   | 42.5928°  | Rhizosphere soil | 151  | 111334 | 1.3562  | Cropland  | 13   | 598  | 8.2  | Spain     | <i>Vitis vinifera</i>   |
|                                     | c44d6cbd333d56b5dffbb010ede59f87  | ITS1 | 68233 | ITS9MUNngs/ITS4ngsUni | 25.6823°   | 58.1761°  | Soil             | 1    | 5129   | 0.1949  | Urban     | 5.4  | 738  | NA   | Estonia   | NA                      |
|                                     | f7363f680630637ff0abdcc37e61da28  | ITS1 | 699   | ITS1F/ITS4            | 149.5980°  | -30.2007° | Soil             | 22   | 172977 | 0.1271  | Cropland  | 19.3 | 600  | 7.3  | Australia | NA                      |
|                                     | 0ae8874645603a0a1b3449fd635c6e20  | ITS1 | 14940 | ITS3_KYO2/ITS4        | -2.7738°   | 42.5406°  | Root             | 857  | 153279 | 5.5911  | Cropland  | 13   | 626  | 8.2  | Spain     | <i>Vitis vinifera</i>   |
|                                     | 0c3c6f8057a971cd017f76aff0b0149   | ITS1 | 11441 | ITS5/5.8S_fungi       | -3.1097°   | 52.6375°  | Soil             | 5722 | 227200 | 25.1848 | Grassland | 9.1  | 1218 | 5.2  | UK        | NA                      |
|                                     | 3ff68c27a9f6b92c0ece003bef060a34  | ITS1 | 11441 | ITS5/5.8S_fungi       | -3.1097°   | 52.6375°  | Soil             | 5722 | 227200 | 25.1848 | Grassland | 9.1  | 1218 | 5.2  | UK        | NA                      |
|                                     | 98862b05554d102f490d20ac87d036df  | ITS1 | 11441 | ITS5/5.8S_fungi       | -3.1097°   | 52.6375°  | Soil             | 5722 | 227200 | 25.1848 | Grassland | 9.1  | 1218 | 5.2  | UK        | NA                      |
|                                     | 55c448788fe0a0fa89072522a5b6e997  | ITS1 | 29417 | ITS3_KYO2/ITS4        | -2.8528°   | 42.5803°  | Rhizosphere soil | 1375 | 145254 | 9.4661  | Cropland  | 13.1 | 602  | 8.1  | Spain     | <i>Vitis vinifera</i>   |
|                                     | ce07c48dee18aa3bddc8ea83536bfb5   | ITS1 | 11441 | ITS5/5.8S_fungi       | -3.1097°   | 52.6375°  | Soil             | 5722 | 227200 | 25.1848 | Grassland | 9.1  | 1218 | 5.2  | UK        | NA                      |
|                                     | d79d1f153361d021bd226531ec9d8815  | ITS1 | 14940 | ITS3_KYO2/ITS4        | -2.7738°   | 42.5406°  | Root             | 857  | 153279 | 5.5911  | Cropland  | 13   | 626  | 8.2  | Spain     | <i>Vitis vinifera</i>   |
|                                     | 212d253464c4575145ad1a7d2e7c70b2  | ITS1 | 11441 | ITS5/5.8S_fungi       | -3.1097°   | 52.6375°  | Root             | 5722 | 227200 | 25.1848 | Grassland | 9.1  | 1218 | 5.2  | UK        | NA                      |
|                                     | 80601a9a574b822537bef70ad03d1b02  | ITS1 | 14940 | ITS3_KYO2/ITS4        | -2.7738°   | 42.5406°  | Root             | 857  | 153279 | 5.5911  | Cropland  | 13   | 626  | 8.2  | Spain     | <i>Vitis vinifera</i>   |
|                                     | f226b5efb0204f485a373dfa46486514  | ITS2 | 4832  | flITS9/ITS4           | -89.3500°  | 43.1333°  | Soil             | 68   | 137865 | 0.4932  | Grassland | 8.7  | 775  | 6.35 | USA       | <i>Panicum virgatum</i> |
|                                     | b15daf29f8118851bd841fa664a68049  | ITS2 | 18872 | ITS86F/ITS4           | 124.2330°  | 43.3167°  | Soil             | 228  | 60579  | 3.7636  | Cropland  | 7    | 569  | 6.95 | China     | <i>Zea mays</i>         |
|                                     | 37fa421de98fa0e98a0d844ac8074ae9  | ITS2 | 23749 | ITS86F/ITS4           | 124.2330°  | 43.3167°  | Soil             | 268  | 46501  | 5.7633  | Cropland  | 7    | 569  | 6.95 | China     | <i>Zea mays</i>         |
|                                     | 438e8a013caac8741dafba7405014dfa  | ITS2 | 16460 | ITS3ngs mix/ITS4ngs   | 3.5325°    | 50.5083°  | Soil             | 34   | 142203 | 0.2390  | Cropland  | 10.7 | 758  | 5.3  | Belgium   | <i>Triticum</i> sp.     |
|                                     | 4da2830e5e269b41a50c1d0a57f20435  | ITS2 | 16326 | ITS1F/ITS4            | 149.5970°  | -30.2012° | Soil             | 69   | 171162 | 0.4031  | Cropland  | 19.3 | 600  | 7.2  | Australia | NA                      |
|                                     | 7b6c0de1b81efc5b48faedb8ea67b5f0  | ITS2 | 33968 | ITS86F/ITS4           | 124.2330°  | 43.3167°  | Soil             | 325  | 54260  | 5.9896  | Cropland  | 7    | 569  | 6.95 | China     | <i>Zea mays</i>         |

|                                  |      |       |             |           |          |      |     |        |        |           |      |     |      |         |                         |
|----------------------------------|------|-------|-------------|-----------|----------|------|-----|--------|--------|-----------|------|-----|------|---------|-------------------------|
| 93cf081c95521d6d7f9248e32a55ad33 | ITS2 | 9954  | fITS9/ITS4  | 8.7719°   | 50.2717° | Soil | 1   | 5166   | 0.1935 | Grassland | 10.3 | 588 | 6.5  | Germany | <i>Geranium molle</i>   |
| a79a2b87879ab5a20b789ec70ebdb1e9 | ITS2 | 5905  | fITS9/ITS4  | -85.3700° | 42.3800° | Soil | 598 | 183795 | 3.2536 | Grassland | 9.2  | 881 | 6.35 | USA     | <i>Panicum virgatum</i> |
| bfd8a04230953813b7d6605244f58716 | ITS2 | 3293  | ITS86F/ITS4 | 124.2330° | 43.3167° | Soil | 201 | 59989  | 3.3506 | Cropland  | 7    | 569 | 6.9  | China   | <i>Zea mays</i>         |
| b7934349623461d77b89c638a0b0f56f | ITS2 | 11717 | ITS86F/ITS4 | 124.2330° | 43.3167° | Soil | 161 | 56825  | 2.8332 | Cropland  | 7    | 569 | 6.9  | China   | <i>Zea mays</i>         |

<sup>1</sup>Internal Transcribed Spacer region; <sup>2</sup> Number assigned to a particular environmental sample; <sup>3</sup>Abundance of a singular sequence in a particular environmental sample; <sup>4</sup>Total abundance of ITS sequences found in a particular environmental sample; <sup>5</sup>Relative abundance of a singular ITS sequence in a particular environmental sample; <sup>6</sup>Mean Annual Temperature (°C); <sup>7</sup>Mean Annual Precipitation (mm).

**Figure S1.**

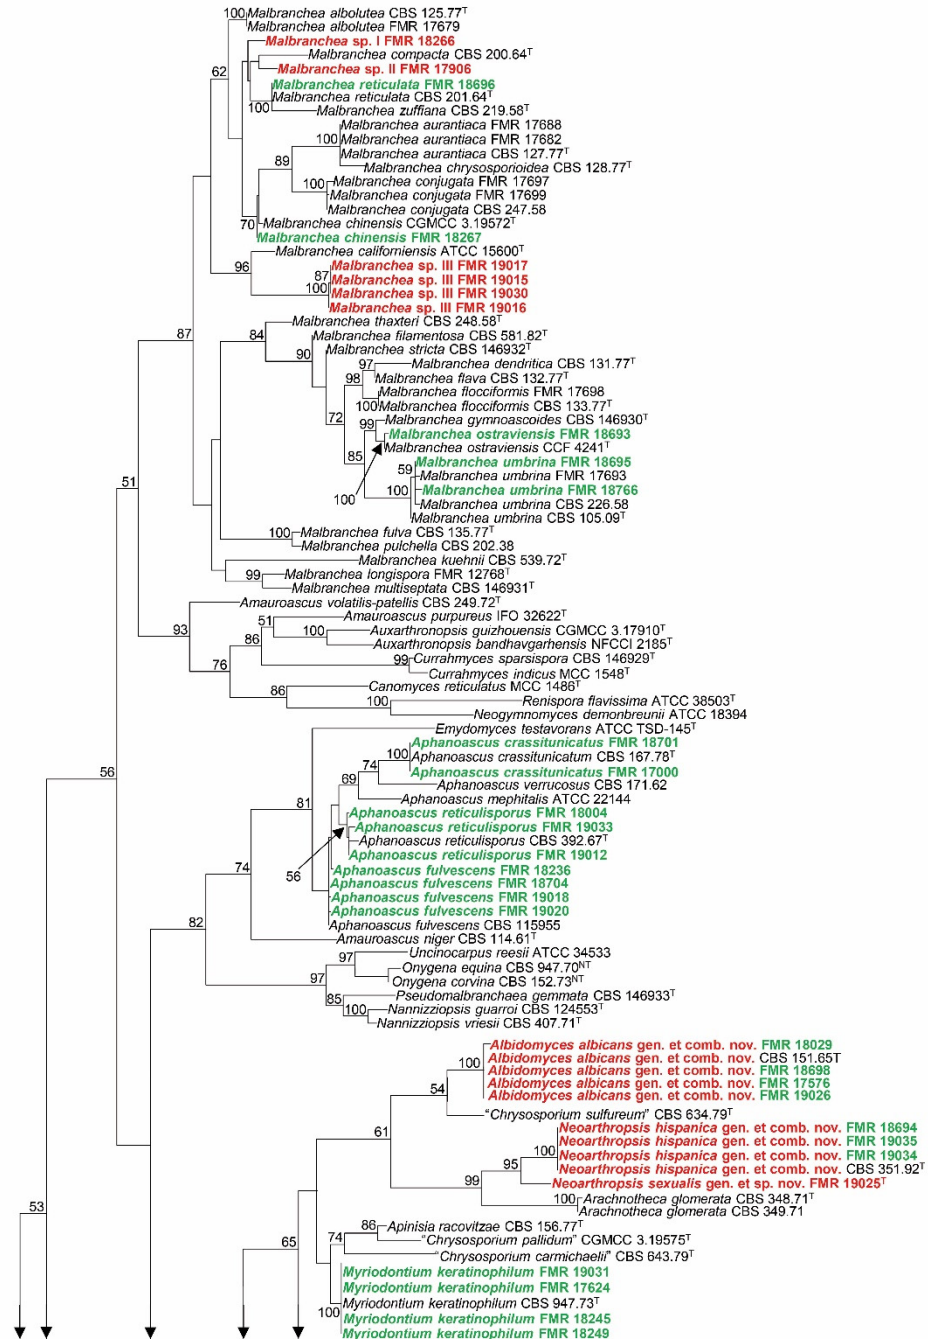

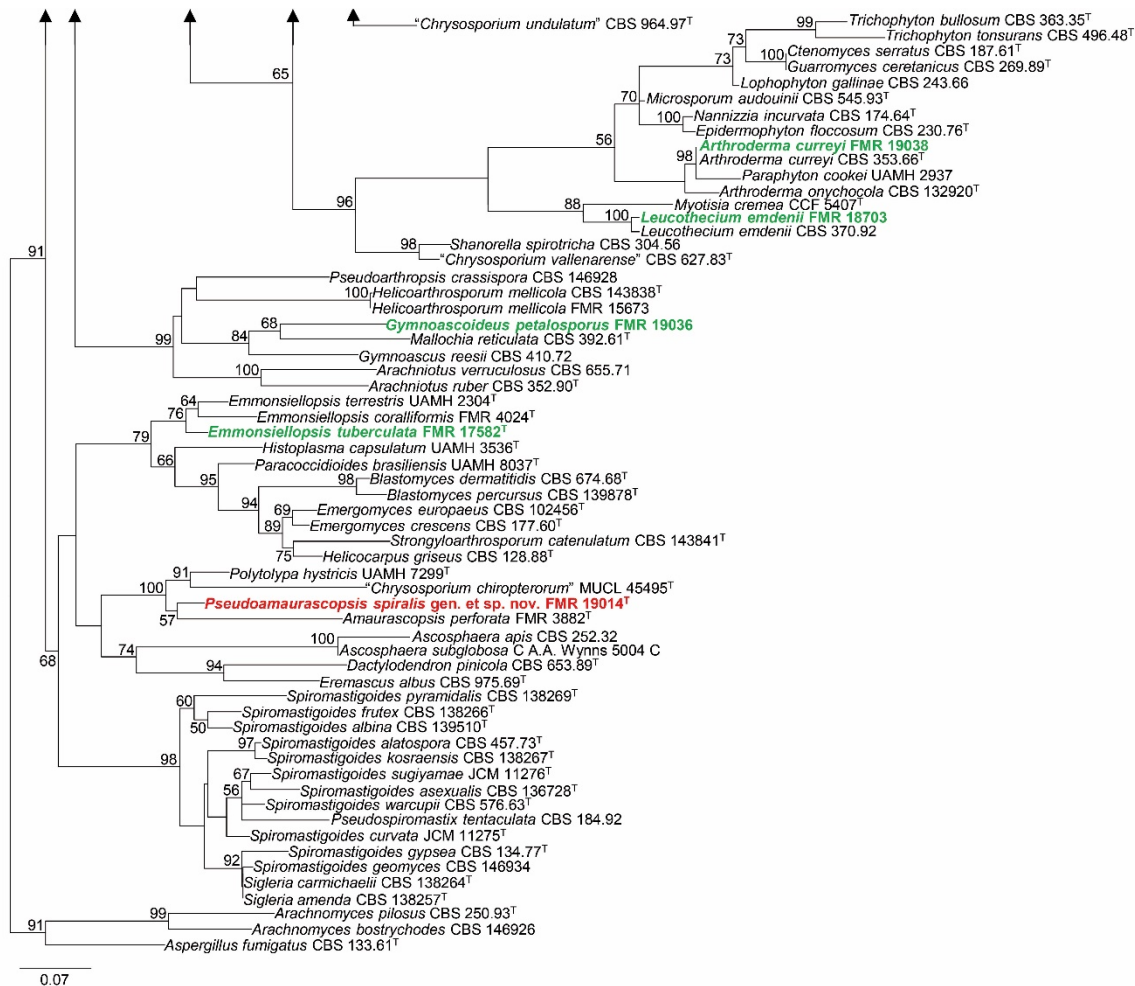

**Figure S1.** RAXML ITS tree of the order *Onygenales*, including the strains recovered from freshwater sediments studied in this work. The strains belonging to undescribed species or genera are in red and in bold. The strains belonging to known species are in green and in bold. Determined by MEGA software v.6, the best nucleotide substitution model for ML analysis was K2+G+I. The aligned data set was 598 bp long, with 440 variable sites and 373 phylogenetically informative. Branch lengths are proportional to phylogenetic distance. Bootstrap support values above 50% are indicated on the nodes. The tree was rooted to *Arachnomyces pilosus* CBS 250.93, *Arachnomyces bostrychodes* CBS 146926, and *Aspergillus fumigatus* CBS 133.61. Quote marks indicate species with unresolved taxonomy. <sup>T</sup>= Ex-type strain.

**Fig. S2.**  
ITS phylotree of *Neoarthritisidaceae* fam. nov.  
— Clade IV in Fig. 1

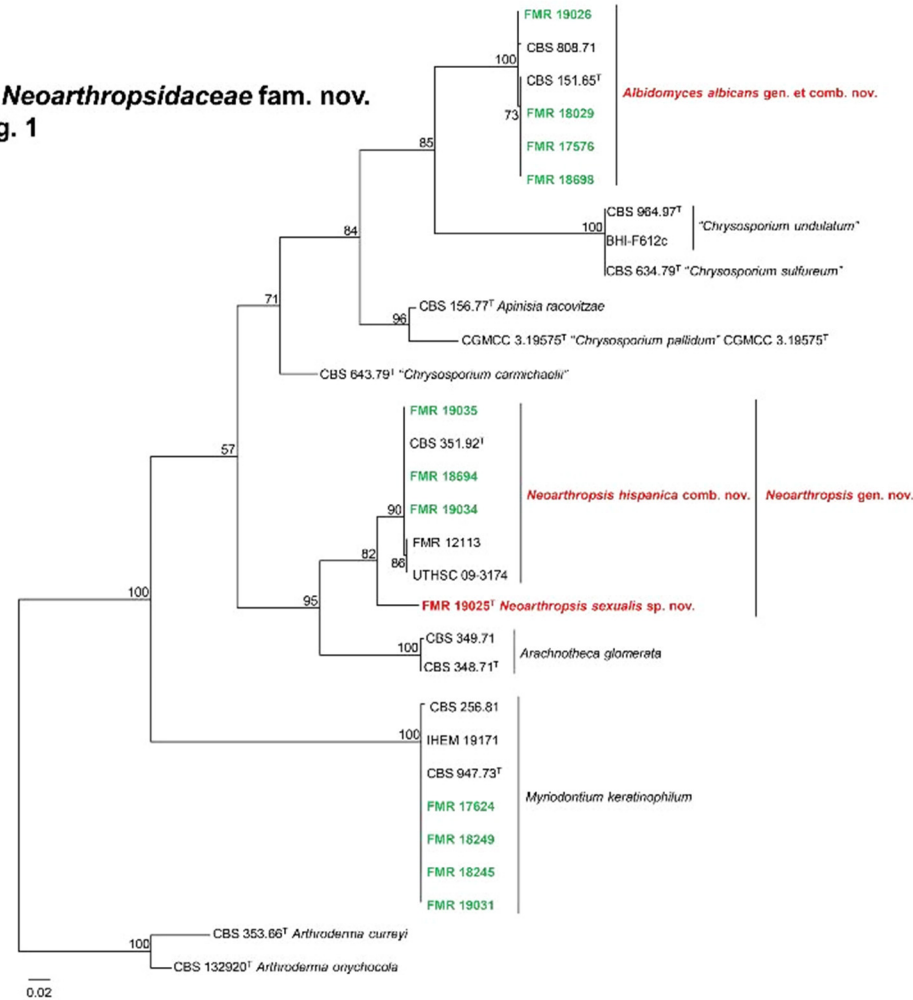

**Figure S2.** RAxML ITS tree of the family *Neoarthritisidaceae*, including the strains recovered from freshwater sediments studied in this work. New taxa proposed are in red and in bold; strains of known species identified in our study are in green. Determined by MEGA software v.6., the best nucleotide substitution model for ML analysis was K2+G. The aligned data set was 408 bp long, with 161 variable sites and 149 phylogenetically informative. Branch lengths are proportional to phylogenetic distances. Bootstrap support values above 70% are indicated on the nodes. The tree was rooted to *Arthroderma curreyi* CBS 335.66 and *Arthroderma onychocola* CBS 132920. <sup>T</sup>= Ex-type strain.

Figure S3.

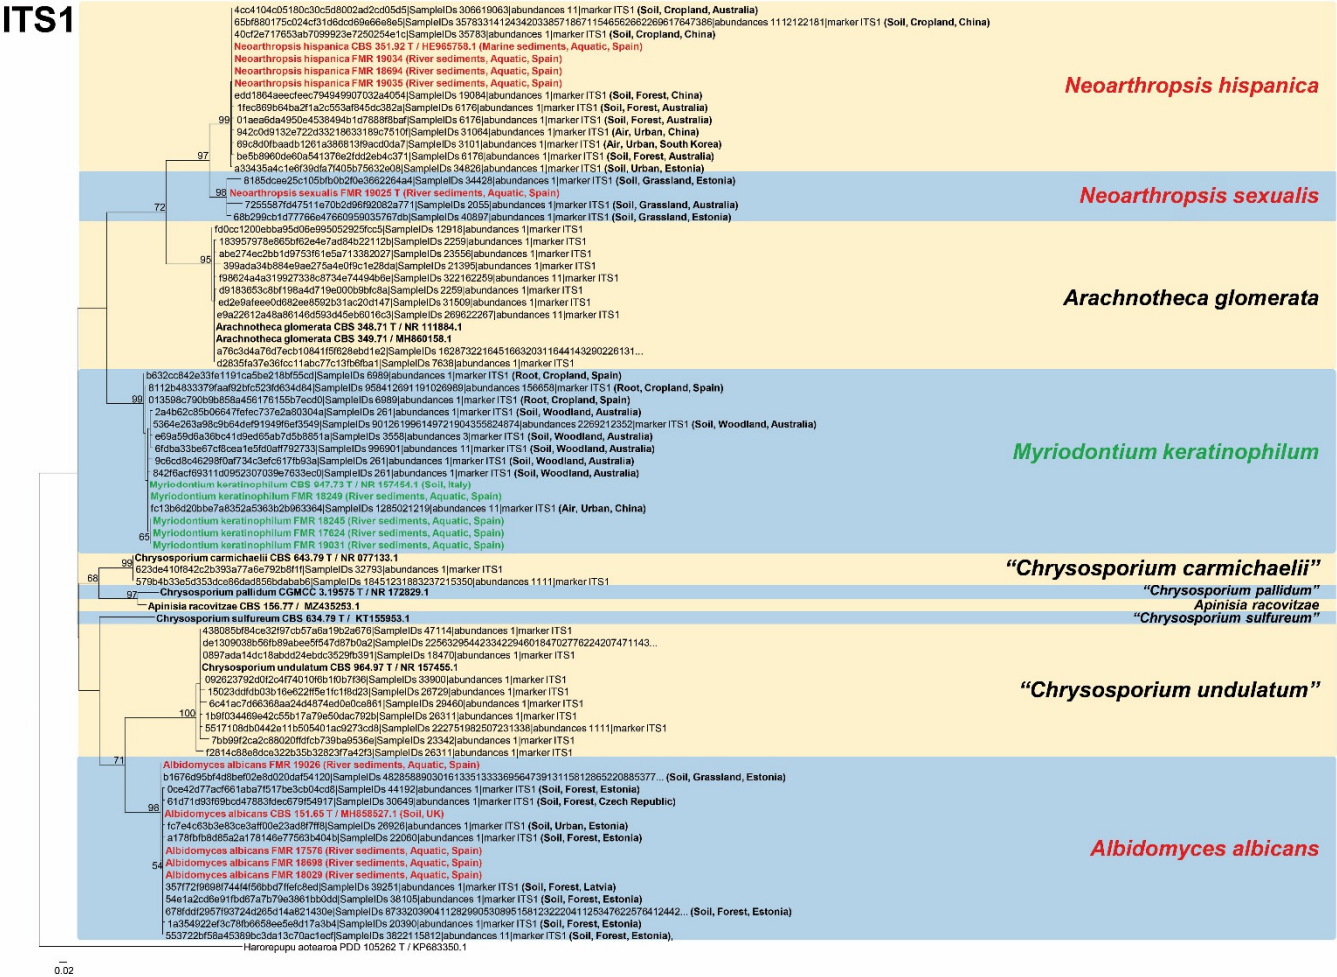



## ITS2

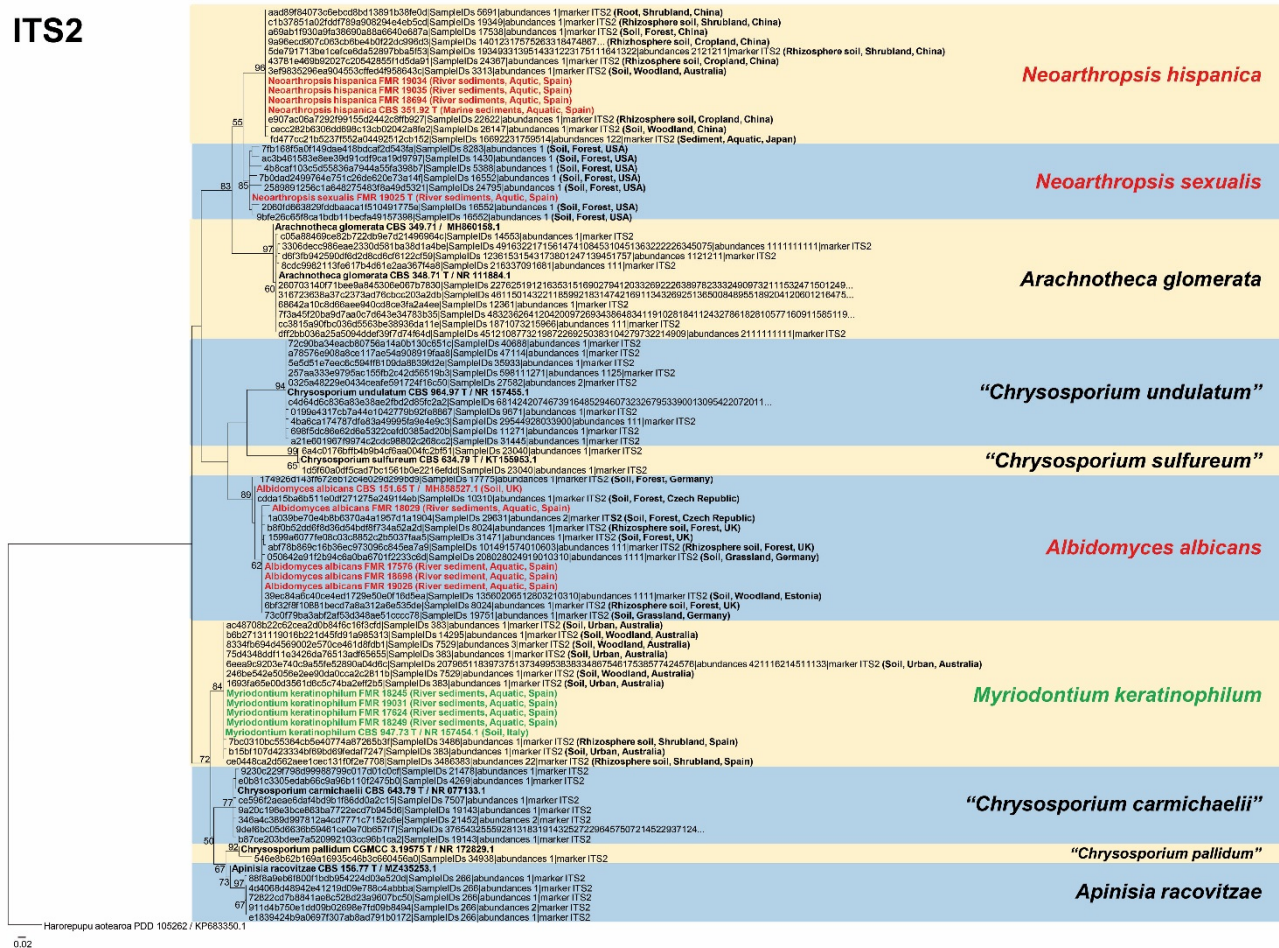

**Figure S3.** RAxML phylogenetic tree showing the relationships among species investigated in the new family *Neoarthropsidaceae*, and related ITS1/ITS2 environmental sequences deposited in the GlobalFungi database. Titles of sequences contain sequence and sample codes taken from GlobalFungi. ITS1/ITS2 sequences of novel taxa are in red. ITS1/ITS2 sequences of sediment isolates and ex-type strains of known species identified in this study are in green. ITS1/ITS2 sequences of known species retrieved from GenBank are in bold. Geographical and ecological information contained in environmental sequences associated to the novel taxa are written in bold. Determined by MEGA software v.6., the best nucleotide substitution model for ML analysis was K2+G for ITS1 and JC+G for ITS2. The alignments data sets were 381 bp long for ITS1 and 181 bp for ITS2; with 228 variable sites for ITS1 and 127 for ITS2; and 167 phylogenetically informative for ITS1 and 97 for ITS2. Branch lengths are proportional to phylogenetic distances. Bootstrap support values above 50% are indicated on the nodes. The trees were rooted to *Harorepupu aotearoa* PDD 105262. Quote marks indicate species with unresolved taxonomy. T= Ex-type strain.



## Clade X (Fig. 1) ITS1

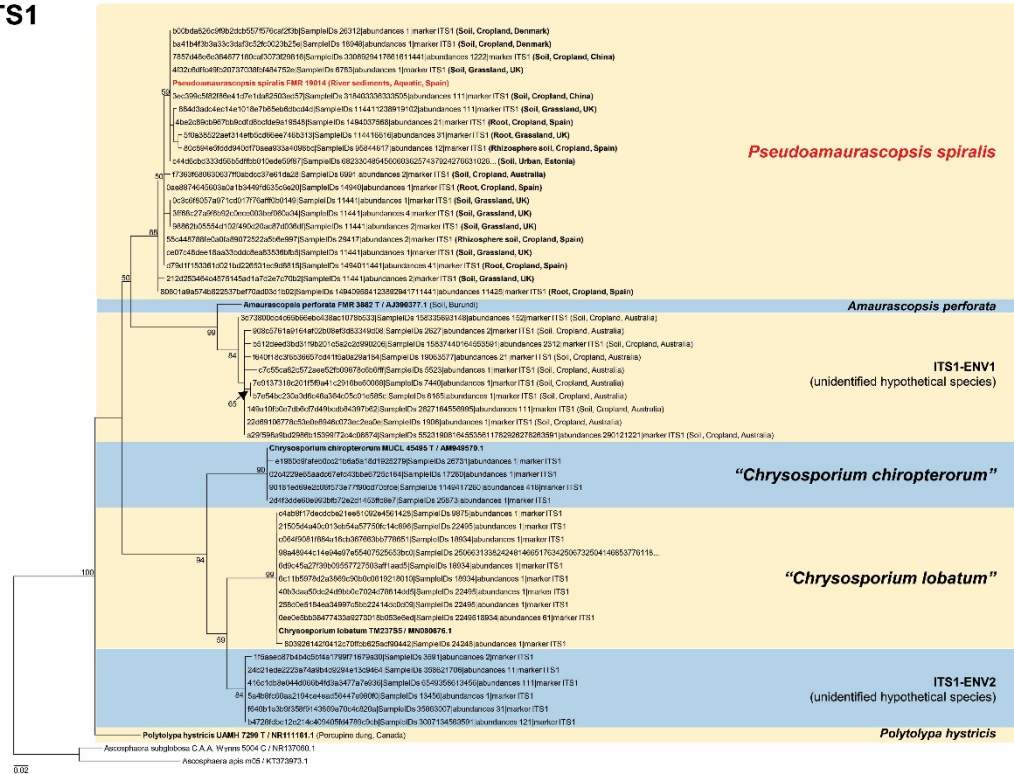

## Clade X (Fig. 1) ITS2

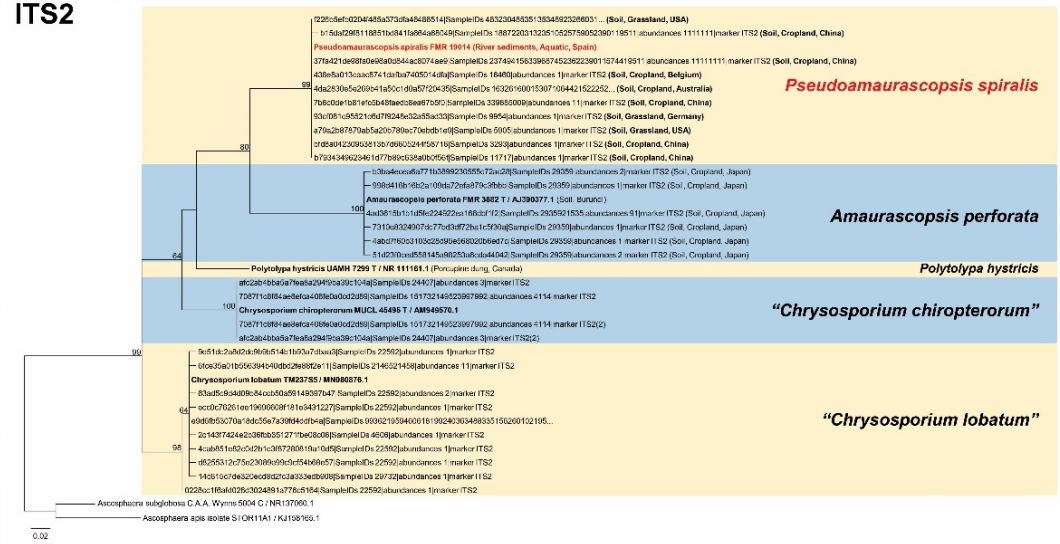

**Figure S4.** RAxML phylogenetic tree showing the relationships among species investigated in the Clade X (*incertae sedis* at the family level), and related ITS1/ITS2 environmental sequences deposited in the GlobalFungi database. Titles of sequences contain sequence and sample codes taken from GlobalFungi. ITS1/ITS2 sequence of the novel genus *Pseudoamaurascopsis* is in red. ITS1/ITS2 sequences of known species retrieved from GenBank are in bold. Geographical and ecological information contained in environmental sequences associated to the novel genus are written in bold. Determined by MEGA software v.6., the best nucleotide substitution model for ML analysis was K2+G for ITS1 and T92 for ITS2. The alignments data sets were 208 bp long for ITS1 and 171 bp for ITS2; with 125 variable sites for ITS1 and 80 for ITS2; and 97 phylogenetically informative for ITS1 and 50 for ITS2. Branch lengths are proportional to phylogenetic distances. Bootstrap support values above 50% are indicated on the nodes. The trees were rooted to *Ascosphaera subglobosa* C.A.A. Wynns 5004 (C) and *Ascosphaera apis* m05. Quote marks indicate species with unresolved taxonomy. <sup>†</sup>= Ex-type strain.

Figure S5.

ITS1

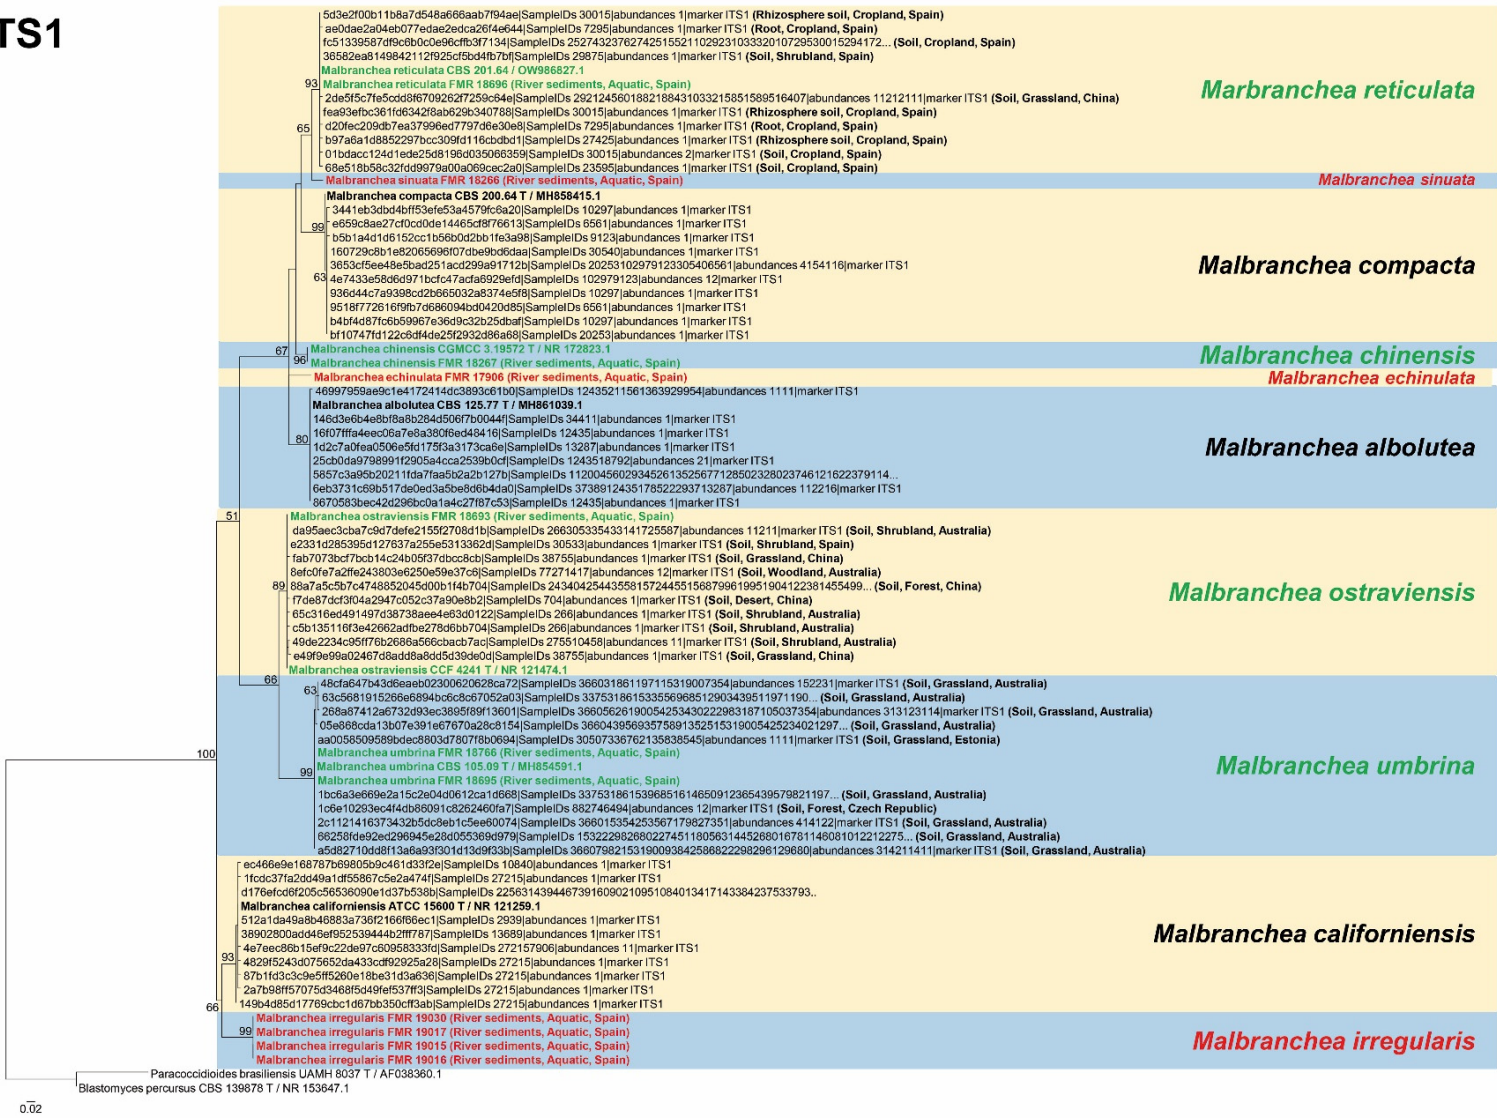



Figure S5.

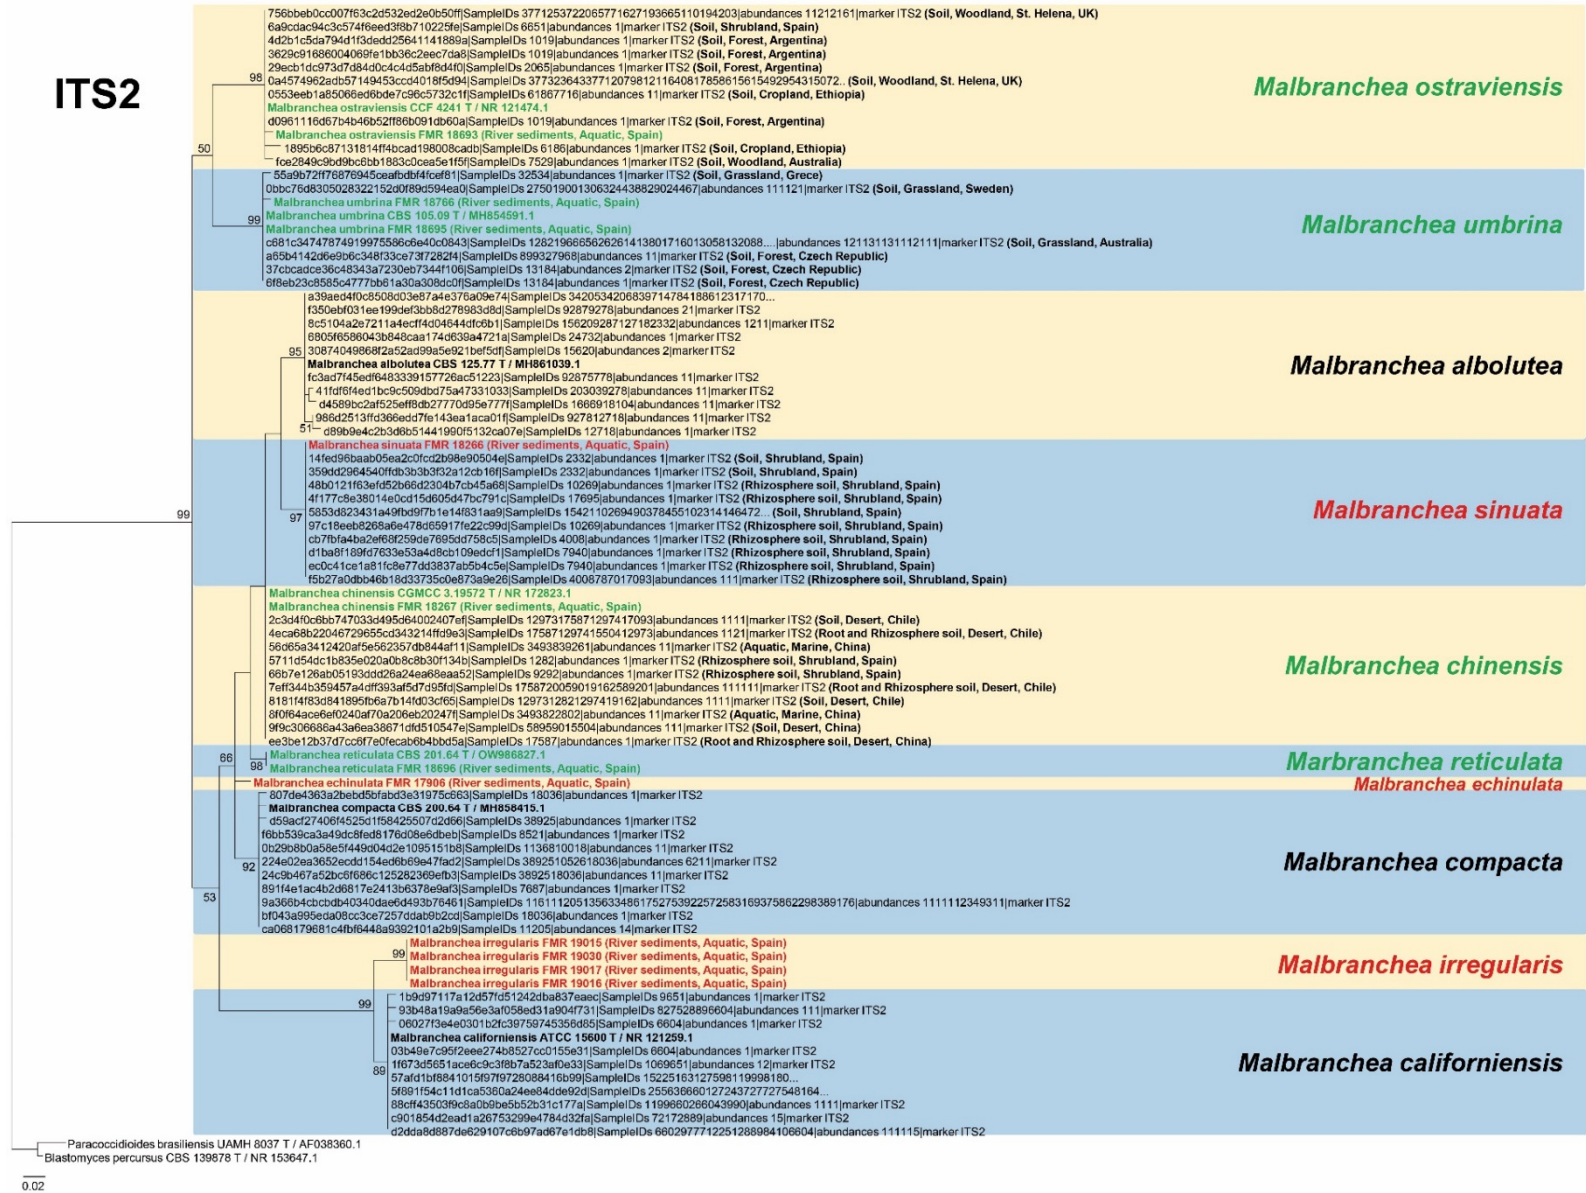

**Figure S5.** RAxML phylogenetic tree showing the relationships among some species in the *Malbrancheaceae*, and related ITS1/ITS2 environmental sequences deposited in the GlobalFungi data base. Titles of sequences contain sequence and sample codes taken from GlobalFungi. ITS1/ITS2 sequences of novel *Malbranchea* species are in red. ITS1/ITS2 sequences of sediment isolates and ex-type strains of known species identified in this study are in green. ITS1/ITS2 sequences of known species retrieved from GenBank are in bold. Geographical and ecological information contained in environmental sequences associated to the novel taxa are written in bold. Determined by MEGA software v.6., the best nucleotide substitution model for ML analysis was K2+G for ITS1 and T92+G for ITS2. The alignments data sets were 315 bp long for ITS1 and 149 bp for ITS2; with 148 variable sites for ITS1 and 77 for ITS2; and 134 phylogenetically informative for ITS1 and 66 for ITS2. Branch lengths are proportional to phylogenetic distances. Bootstrap support values above 50% are indicated on the nodes. The trees were rooted to *Paracoccidioides brasiliensis* UAMH 8037 and *Blastomyces persicus* CBS 139878. <sup>†</sup>= Ex-type strain.
